---

# COMPUTATIONAL MAPPING OF THE HUMAN-SARS-CoV-2 PROTEIN-RNA INTERACTOME

---

A bioRxiv PREPRINT

Marc Horlacher<sup>1</sup>, Svitlana Oleshko<sup>1</sup>, Yue Hu<sup>1</sup>, Mahsa Ghanbari<sup>2</sup>, Giulia Cantini<sup>1</sup>, Patrick Schinke<sup>1</sup>,  
Ernesto Elorduy Vergara<sup>1</sup>, Florian Bittner<sup>3</sup>, Nikola S. Mueller<sup>3</sup>, Uwe Ohler<sup>2</sup>,  
Lambert Moyon<sup>1,\*</sup>, Annalisa Marsico<sup>1,\*</sup>

**1 Computational Health Center, Helmholtz Center Munich, Germany**

**2 Berlin Institute for Medical Systems Biology, Max Delbrück Center for Molecular Medicine, Berlin, Germany**

**3 Knowing01 GmbH, Munich, Germany**

\* [lambert.moyon@helmholtz-muenchen.de](mailto:lambert.moyon@helmholtz-muenchen.de) and [annalisa.marsico@helmholtz-muenchen.de](mailto:annalisa.marsico@helmholtz-muenchen.de)

May 2, 2022

## ABSTRACT

1 Viruses hijack the host cell's machinery for the purpose of viral replication and interfere with the  
2 activity of master regulatory proteins – including RNA binding proteins (RBPs). These RBPs are  
3 major actors in several steps of RNA processing, able to recognize and bind to their target RNAs  
4 by means of sequence or structure motifs. While host RBPs are known to represent critical factors  
5 for RNA viral replication, stability, and escape of host immune responses, their role in the context  
6 of SARS-CoV-2 infection remains poorly understood. Few experimental studies have mapped the  
7 SARS-CoV-2 RNA-protein interactome in infected human cells, but they are limited in the resolution  
8 and exhaustivity of their output. In contrast, computational approaches enable rapid screening of a  
9 large number of human RBPs for putative interactions with the viral RNA and are thus crucial to  
10 prioritize candidates for further experimental investigation. Here, we investigated the role of RBPs in  
11 the context of SARS-CoV-2 by constructing a first single-nucleotide *in silico* map of human RBP /  
12 viral RNA interactions. To this end, we trained pysster and DeepRiPe, two deep learning methods  
13 based on convolutional neural networks, to learn the sequence preferences of >100 RBPs from eCLIP  
14 and PAR-CLIP data generated on human cell lines. We then applied our models cross-species to  
15 predict the propensity of each host RBP to bind to the SARS-CoV-2 RNA genome at single-base  
16 resolution. We further evaluated conservation of RBP binding between 6 other human pathogenic  
17 coronaviruses and identified sites of conserved and differential binding in the untranslated regions of  
18 SARS-CoV-1, SARS-CoV-2 and MERS. We scored the impact of sequence variants from 11 viral  
19 strains on protein-RNA interaction, including alpha, delta and omicron strains, and identified a set  
20 of gain-and loss of binding events. Further, we performed a systematic *in silico* mutagenesis to  
21 screen the SARS-CoV-2 genome for hypothetical high impact variants, which provides a resource to  
22 anticipate the regulatory impact of variants on novel strains. Lastly, we explore the clinical impact  
23 of the identified RBPs by linking them to other functional data and *OMICs* on COVID-19 patients  
24 from other studies. Our results contribute towards a deeper understanding of how viruses hijack host  
25 cellular pathways by providing insights into new players of host-virus interactions and provide a rich  
26 resource that enables the discovery of new antiviral targets and therapeutics. To facilitate the use  
27 of our results in future studies, we integrated the protein-RNA interaction map and variant impact  
28 predictions into an online resource (<https://sc2rbpmap.helmholtz-muenchen.de>). By providing the  
29 community with pre-trained RBP models we enable host-viral RNA interaction prediction for any  
30 (RNA) virus beyond SARS-CoV-2 and provide a tool to efficiently monitor new viral strains.

31 **Keywords** SARS-CoV-2 · RBP binding · deep learning

## COMPUTATIONAL MAPPING OF THE HUMAN-SARS-CoV-2 PROTEIN-RNA INTERACTOME

### 32 **1 Introduction**

33 SARS-CoV-2, causative agent of the recent COVID-19 pandemic, has and still is affecting the lives of billions of people  
34 worldwide. Despite the large-scale vaccination effort, the number of infections and deaths remains high, primarily  
35 among the non-vaccinated and otherwise vulnerable individuals. Difficulty to control SARS-CoV-2 infections is  
36 partly due to the continuous emergence of novel viral variants, against which the full efficacy of current vaccines  
37 is still debated, as well as the lack of effective medication. This calls for a better understanding of the biology of  
38 SARS-CoV-2 to design alternative therapeutic strategies. SARS-CoV-2 is a betacoronavirus with a positive-sense,  
39 single-stranded RNA of ~30kb (90). Upon infection, the released RNA molecule depends on the host cell's protein  
40 synthesis machinery to express a set of viral proteins crucial for replication (73). The genomic RNA is translated  
41 to produce non-structural proteins (nsps) from two open reading frames (ORFs), ORF1a and ORF1b, and it also  
42 contains untranslated regions (UTRs) at the 5' and 3' ends of the genomic RNA (90). A recent study revealed the  
43 complexity of the SARS-CoV-2 transcriptome, due to numerous discontinuous transcription events (39). Negative sense  
44 RNA intermediates are generated to serve as the template for the synthesis of positive-sense genomic RNA (gRNA)  
45 and subgenomic RNAs (sgRNA) which encode conserved structural proteins (spike protein [S], envelop protein [E],  
46 membrane protein [M] and nucleocapsid protein [N]), and several accessory proteins (3a, 6, 7a, 7b, 8 and 10) (39).  
47 During its life cycle, SARS-CoV-2 extensively interacts with host factors in order to facilitate cell entry, transcription  
48 of viral RNA and translation of subgenomic mRNAs, virion maturation and evasion of the host's immune response  
49 (90; 11; 20). Mechanisms of virus-host interaction are multifaceted and include protein-protein interactions (PPIs),  
50 binding of viral proteins to the host transcriptome (96), RNA-RNA interactions and binding of host proteins to viral  
51 RNAs. Studies on SARS-CoV-2 infected cells to date have predominantly focused on the entry of SARS-CoV-2 into  
52 human epithelial cells, which involves the interaction of the viral spike protein S with the human ACE2 receptor  
53 (39). Other studies characterized changes in the host cell transcriptome and proteome upon infection and identified  
54 host factors essential for viral replication via CRISPR screenings (78; 25; 92). Lastly, mapping of protein-protein  
55 interactions (PPIs) between viral and host proteins has revealed cellular pathways important for SARS-CoV-2 infection.  
56 For instance, a recent study identified close to 300 host-virus interactions in the context of SARS-CoV-2 (25). However,  
57 these studies have been of limited impact with respect to revealing how the viral RNA is regulated during infection.

58 RNA viruses hijack key cellular host pathways by interfering with the activity of master regulatory proteins, including  
59 RNA binding proteins (RBPs) (29). RBPs are a family of proteins that bind to RNA molecules and control several  
60 aspects of cellular RNA metabolism, including splicing, stability, export and translation initiation. In most cases,  
61 RNA targets of an RBP share at least one common local sequence or structural feature – a so-called motif - which  
62 facilitates the recognition of the RNA by the protein. Host cell RBPs have previously been reported to interact with  
63 viral RNA elements and influence several steps of the viral life cycle, such as recruitment of viral RNA to the membrane  
64 and synthesis of subgenomic viral RNAs (47; 48; 59; 21). Indeed, in a recent proteome-wide study, 342 RBPs were  
65 identified to be annotated with gene ontology (GO) terms related to viruses, infection or immunity with a further 130  
66 RBPs being linked to viruses in literature (21). Examples include the Dengue virus Manokaran et al. (56), the Murine  
67 Norovirus (MNV) (88) and Sindbis virus (SINV), where it has been shown that RBPs stimulated by the infection  
68 redistribute to viral replication factories and modulate the success of infection (21). The ability of viral RNAs to  
69 recruit essential host RBPs could explain permissiveness of certain cell types as well as its range of hosts (48), which  
70 is especially relevant for zoonotic viruses such as SARS-CoV-2. In the context of SARS-CoV infection, DEAD-box  
71 helicase 1 (DDX1) RBP has been shown to facilitate template read-through and thus replication of genomic viral  
72 RNA, while heterogeneous nuclear ribonucleoprotein A1 (hnRNPA1) might regulate viral RNA synthesis (20; 54; 94).  
73 Multiple recent studies show that SARS-CoV-2 RNAs extensively interact with both pro- and anti-viral host RBPs  
74 during its life cycle (18; 69; 46; 43). Using comprehensive identification of RNA-binding proteins by mass spectrometry  
75 (ChIRP-MS), Flynn et al. (18) identified a total of 229 vRNA-bound host factors in human Huh7.5 cells with prominent  
76 roles in protecting the host from virus-induced cell death. Schmidt et al. (69) identified 104 vRNA-bound human  
77 proteins in the same cell line via RNA antisense purification and quantitative mass spectrometry (RAP-MS), with  
78 GO-terms strongly enriched in translation initiation, nonsense-mediated decay and viral transcription. The authors  
79 further confirmed the specific location of vRNA binding sites for cellular nucleic acid-binding protein (CNBP) and  
80 La-related protein 1 (LARP1) via enhanced cross-linking immunoprecipitation followed by sequencing (eCLIP-seq),  
81 which were both associated to restriction of SARS-CoV-2 replication (69). Lee et al. (46) identified 109 vRNA-bound  
82 proteins via a modified version of the RAP-MS protocol and linked those RBPs to RNA stability control, mRNA  
83 function, and viral process. Further, the authors showed 107 of those host factors are found to interact with vRNA of  
84 the seasonal betacoronavirus HCoV-OC43, suggesting that the vRNA interactome is highly conserved. Finally, Labeau  
85 et al. (43) used ChIRP-MS to identify 142 host proteins that bind to the SARS-CoV-2 RNA and showed, in contrast  
86 to Flynn et al. (18), that siRNA knockdown of most RBPs cellular expression leads to a significant reduction in viral  
87 particles, suggesting that the majority of RBPs represent pro-viral factors. Taken together, there is strong evidence that  
88 SARS-CoV-2, like other RNA viruses, heavily relies on the presence of a large number of essential RNA-binding host

## COMPUTATIONAL MAPPING OF THE HUMAN-SARS-CoV-2 PROTEIN-RNA INTERACTOME

89 factors. However, the sets of SARS-CoV-2 relevant RBPs from different studies have limited overlap and the outcome  
90 depends on the specific cell line utilized in the experiment. Further, most studies lack information of exact binding  
91 sites of human RBPs on viral RNA. A comprehensive large scale analysis of the propensities of different host RBPs to  
92 bind to RNA elements across the SARS-CoV-2 genome is currently missing.

93 Cross-linking and immunoprecipitation (IP) followed by sequencing (CLIP-seq) assays (26), including PAR-CLIP  
94 and eCLIP protocols, are the most widely used methods to measure RBP-RNA interactions *in vivo* at high nucleotide  
95 resolution and are able to provide sets of functional elements that are directly bound by an RBP of interest (85). While  
96 CLIP-seq experiments allow for precise identification of host factor interaction with viral RNAs, the high cost of  
97 profiling interactions across a large number of RBPs becomes prohibitive at larger scales, as dedicated pull-down  
98 and sequencing has to be performed for each RBP individually. Therefore, such datasets have been generated only  
99 for a small number of proteins on SARS-CoV-2 (69). Further, in order to keep up with the continuous emergence of  
100 novel SARS-CoV-2 variants, CLIP-seq experiments would need to be repeated for the genome of each viral strain in  
101 order to account for (or to identify) gain-or loss-of-binding variants. Recent advances in machine-and deep-learning  
102 have enabled a cheaper but powerful alternative by computationally modeling the binding preference of RBPs using  
103 information from existing CLIP-seq datasets, such as those generated as part of the ENCODE project (86).

104 In this study, we train and optimize two recent Convolutional Neural Network (CNN) based methods, Pysster (5) and  
105 DeepRiPe (23), on hundreds of human eCLIP and PAR-CLIP datasets and use trained models to predict RBP binding  
106 on viral sequences. By that we provide, to our knowledge, the first comprehensive single-nucleotide resolution *in*  
107 *silico* map of viral RNA - host RBP interaction for SARS-CoV-2 as well as 6 other human coronaviruses and identify  
108 sequence variants which significantly alter RBP-RNA interaction across 11 different SARS-CoV-2 variants-of-concern.  
109 We recapitulate human RBPs which are predicted or experimentally determined to binding to SARS-CoV-2 by previous  
110 studies and identify novel host RBP candidates with no previously reported binding to SARS-CoV-2. We integrate  
111 knowledge of these proteins across other pathogens and highlight RBPs with clinical relevance, by annotating those that  
112 were found among SARS-CoV-2-associated genes from Genome Wide Association Studies (GWAS) (64), CRISPR  
113 studies (24; 30; 70; 91), physical binding experiments (18; 69; 89), or patient OMICS data from blood serum and  
114 plasma (10; 12; 13; 22; 57; 63; 71; 95). Finally, we perform extensive *in silico* single-nucleotide perturbations across  
115 the SARS-CoV-2 genome to identify variants that would lead to gain and/or disruption of RBP binding sites and thus  
116 may alter viral fitness.

## 117 2 Results

118 The overall workflow of our approach is summarized in Figure 1, from model training, to the *in silico* mapping of the  
119 SARS-CoV-2 RBP-RNA interactome and downstream analysis. We first obtained binding site information of publicly  
120 available eCLIP experiments of 150 RBPs from the ENCODE (86) database and pre-processed them to obtain a set  
121 of high-quality sites of protein-RNA interaction. For each RBP, a convolutional neural network (CNN) classifier to  
122 predict the likelihood of RBP-binding to an arbitrary input RNA sequence was trained using the *pysster* (5) framework,  
123 resulting in 150 *pysster* models (Figure 1a). For RBPs not contained in the ENCODE dataset, we included DeepRiPe  
124 (23) models pre-trained on 59 PAR-CLIP datasets. Next, we performed extensive model performance evaluation on  
125 custom trained *pysster* models and removed poorly performing models from downstream analysis. Using high-quality  
126 models, we predicted the likelihood of each RBP binding to individual nucleotides in the SARS-CoV-2 genome using  
127 a sliding-window scanning approach (Figure 1b, Methods 3.6). Single-nucleotide binding predictions were further  
128 annotated with empirical p-values to correct for false positive hits; and consecutive high-scoring and significant position  
129 were aggregated into larger binding-site regions. We thus constructed a comprehensive *in silico* binding map of human  
130 RBPs on the SARS-CoV-2 genome and clustered RBP binding sites across different viral genomic regions to unravel  
131 potential regulatory patterns (Figure 1b). Exploiting the capability of CNNs to learn complex sequence patterns, we  
132 additionally validated our approach by identifying known binding motifs at predicted RBP binding sites. Finally, we  
133 utilize our models to score the impact of sequence variant identified in 11 viral strains and identified conserved and  
134 novel binding sites across 6 other coronaviruses, including SARS-CoV-1 and MERS (Figure 1c).

### 135 2.1 Accurate model predictions in human and viral sequences

136 The trained *pysster* models showed a robust area-under-precision-recall-curve (auPRC) performance (Methods 3.7.1),  
137 with a median auPRC of 0.6 across all 150 trained models (Figure 2a). As models were used for scanning of the  
138 full-length viral genome (rather than classification of standalone examples), we further evaluate the model performance  
139 by computing the correlation of the predicted positive-class probabilities with observed ENCODE peaks on a hold-out  
140 set of human transcripts (Methods 3.7.2). Nearly all models showed a significant positive correlation, with a mean  
141 median Spearman correlation coefficient (SCC) across transcripts of 0.149 and a maximum median SCC of 0.38 (Figure  
142 2b), indicating that the trained models are well-suited for the task of scanning across the viral genome. Exemplary  
143 prediction tracks for two held-out human transcripts using *pysster* models of QKI and TARDBP are shown in Figure 2c.  
144 In general, we observe that models which perform well with respect to the auPRC score tend to perform well in the  
145 context of RNA sequence scanning (Figure 2d). To ensure that downstream analyses are based on a high-quality set  
146 of binding site predictions, models with a median SCC of less than 0.1 or an auPRC of less than 0.6 were discarded  
147 (Methods 3.7.2). A total of 63 high-quality *pysster* models were thus kept for predicting on the SARS-CoV-2 genome.  
148 For DeepRiPe, we relied on the results from (23) and retained only those models where informative sequence motifs  
149 were learned during training, leaving a total of 33 RBP models for predicting on the SARS-CoV-2 genome. Of those,  
150 we selected only models for RBPs not contained in the ENCODE database, leading to the addition of 24 high-quality  
151 DeepRiPe models. To confirm that *pysster* models trained on CLIP-seq data from human cell lines are suitable for  
152 cross-species binding-site inference in SARS-CoV-2, we validated our approach for RBPs with available CLIP-seq  
153 experiments from SARS-CoV-2 infected human cell lines. To this end, we obtained eCLIP datasets for CNBP and  
154 LARP1 on both human and SARS-CoV-2 transcripts from Schmidt et al. (69) and processed binding sites as described  
155 in Section 3.1. After generating training samples on CNBP and LARP1 binding sites within human transcripts (Methods  
156 3.2), we trained *pysster* models for both RBPs. We then performed prediction along the SARS-CoV-2 RNA sequence  
157 and compared the resulting prediction scores with observed binding sites as well as the raw eCLIP signal (Figure 2e,  
158 2f). Predictions from *pysster* models trained on human binding sites showed a strong correlation with the raw eCLIP  
159 signal (SCC = 0.332, p-value < 1e-16 for CNBP and SCC = 0.133, p-value = 7.96e-12 for LARP1), and accumulation  
160 of high-scoring positions at the location of called binding sites from the eCLIP experiment (Figure 2f). Further, we  
161 observed significantly higher prediction scores for in-binding-site nucleotides versus outside-binding-site nucleotides  
162 for both RBPs (Figure 2f; t-test, p-value < 1e-16 for CNBP; p-value = 2.44e-6 for LARP1). Taken together, these results  
163 strongly support the validity of our approach for cross-species *in silico* prediction of RBP binding sites.

### 164 2.2 A comprehensive *in silico* binding map of human RBPs on SARS-CoV-2

165 We performed *in silico* binding site calling by identifying consecutive significant and high-scoring positions within the  
166 SARS-CoV-2 genome with both *pysster* and DeepRiPe high-confidence models (Methods 3.9). In the following, we  
167 first demonstrate that our model predictions correspond to *bona fide* RBP binding sites on the SARS-CoV-2 genome by  
168 performing motif analysis and subsequently build a computational map of SARS-CoV-2-human RBP interactions. We  
169 then evaluate the enrichment of different RBPs for different viral genomic regions, as well as their putative regulatory  
170 function in the context of SARS-CoV-2 infection.



## COMPUTATIONAL MAPPING OF THE HUMAN-SARS-CoV-2 PROTEIN-RNA INTERACTOME

### 171 **Predicted RBP binding sites coincide with known binding motifs**

172 Figure 3a and 3b each show single-nucleotide resolution prediction scores of the well-known human RBPs RBFOX2  
173 and TARDBP, obtained from pysster models, and MBNL1 and QKI, obtained from DeepRiPe models. Identified  
174 binding sites (Methods 3.9) are shown below the prediction score tracks. To identify driving features of RBP binding  
175 and to ensure that high-scoring positions represent genuine binding sites rather than model artifacts we performed  
176 feature importance analysis (Methods 3.10) in order to assess whether the sequence features underlying the predictions  
177 at those sites correspond to the binding site preferences of those proteins reported in literature. Specifically, we centered  
178 input windows around predicted binding sites of RBFOX2, TARDBP, MBNL1 and QKI on SARS-CoV-2 to identify  
179 individual nucleotides that were most predictive for classifying the input sequence as 'bound' (Figure 3a and 3b; bottom  
180 track). We observed that feature importance maps around predicted binding sites corresponded to known binding motifs.  
181 For instance, we observe the well-known consensus sequence (T)GCATG recognized by the splicing factor RBFOX2  
182 (36) in the corresponding feature importance maps (Figure 3a, left), as well as the TG-repeat motif, corresponding  
183 to the sequence preference of TARDBP (28), coinciding with its predicted binding sites (Figure 3a, right). Similarly,  
184 DeepRiPe attribution maps with respect to binding sites of QKI show the canonical binding motif TACTAA(C) (82)  
185 (Figure 3b, left). Lastly, the attribution maps computed at each binding site of the splicing factor MBNL1 all harbour  
186 occurrences of the characteristic YGCY motif (45) (Figure 3b, right).

### 187 **Binding site predictions are robust across different datasets and prediction tools**

188 To evaluate the robustness of viral binding site predictions across pysster and DeepRiPe, we compared predictions for a  
189 small set of RBPs where both eCLIP data (used to train a pysster models) and PAR-CLIP data (used for the training of  
190 DeepRiPe models) were available. Among a total of 20 overlapping RBPs, 12 were contained in the sets of high-quality  
191 models for pysster and DeepRiPe selected in 2.1, namely TARDBP, CSTF2, IGF2BP1, PUM2, CSTF2T, QKI, IGF2BP2,  
192 IGF2BP3, CPSF6 FXR1, FXR2 and EWSR1. For each of the 12 RBPs, we then computed the Spearman correlation  
193 between the pysster and DeepRiPe prediction scores across single-nucleotide positions on the viral genome. We  
194 observed a signal correlation higher than 0.1 for 8 out of the 12 RBPs, with a Spearman correlation coefficient ranging  
195 from a maximum of 0.64 (TARDBP) to a minimum of 0.15 (CPSF6) (Supplementary Table 1). In general, we observed  
196 a higher overlap between pysster and DeepRiPe binding site predictions for RBPs harbouring well-defined RNA  
197 sequence motifs, such as QKI, TARDBP, PUM2, CSTF2, and to a less extent, FXR1/2 and IGF2BP1/2/3. In addition,  
198 feature attributions maps at overlapping binding sites of pysster and DeepRiPe with respect to QKI and TARDBP  
199 (Supplementary Figure 1), highlight the presence of the known binding motifs for these two RBPs.

### 200 **Binding preferences and clusters of human RBP predicted sites on the SARS-CoV-2 genome**

201 Given the strong evidence that our predictions reflect true likelihoods of viral sequence regions being bound by human  
202 RBPs, we set out to build a full *in silico* SARS-CoV-2 / human RBP binding map, using the set of 88 high confidence  
203 models from both pysster and DeepRiPe (Section 2.1). Note that we included the CNBP model from Section 2.1, as it  
204 satisfied our performance constrains. Further, for the 12 shared RBPs between pysster and DeepRiPe, only pysster  
205 predictions were considered for downstream analysis, given the high agreement between both models. Figure 3c (right)  
206 depicts the binding profiles of 84 (out of 88) human RBPs which harbor at least one binding site on the SARS-CoV-2  
207 sequence. We clustered RBPs into eight classes based on their relative binding site coverage across different genomic  
208 regions of the SARS-CoV-2 genome (Figure 3c, left). We observe that some clusters of proteins exhibit sparse binding  
209 signal across the SARS-CoV-2 genome (such as clusters 2 and 3), while other clusters contain RBPs which are predicted  
210 to bind extensively across the whole SARS-CoV-2 genome (cluster 4). Interestingly, some clusters harbour RBPs  
211 shown to preferentially bind specific genomic elements (cluster 1 and cluster 5-8, Figure 3c, left). We observe overall  
212 extensive RBP binding coverage mostly at 5' UTRs and genomic regions coding for E, M and N structural proteins, and  
213 less coverage at the spike S gene, as well as the viral 3' UTR. To some extent, clustering of predicted binding sites  
214 groups together RBPs with similar functions in RNA processing and viral regulation, as well similar RNA recognition  
215 mechanisms. Cluster 4 corresponds to a group of well-known regulators of RNA processing, which extensively bind  
216 the viral 5' UTR, as well as the ORF1ab and subgenomic RNAs. This includes proteins from the FXR family (FXR1,  
217 FXR2 and FMR1), which recognize RNA using the K Homology (KH) domain, and control RNA stability, translation  
218 and RNA localization (85). Other RNA translational regulators in the same cluster include the DDX3X helicase, which  
219 was recently identified as host target against SARS-CoV-2 infection (9), and the 40S ribosomal protein S3 (RPS3),  
220 which also binding RNAs through the KH domain. Other proteins in this cluster with well-known roles in regulation  
221 of viral infections are SND1, the splicing regulators (SR) SRSF1 and SRSF2, shown to be implicated in increasing  
222 translation efficiency in the context of HIV infection (55), the RNA demethylase factor FTO, known to regulate viral  
223 infections and HIV-1 protein expression (83), in addition to the aforementioned G3BP1 and DDX3X involved in innate  
224 immunity (8). Cluster 1 predominantly harbors RBPs with binding preference for the viral 3' UTR, including regulators  
225 of RNA stability and proteins involved in 3' end formation and/or regulation of translation. Among those RBPs, the

## COMPUTATIONAL MAPPING OF THE HUMAN-SARS-CoV-2 PROTEIN-RNA INTERACTOME

poly (I:C) binding protein KHDRBS1 has been identified to have pro-viral activity in SFV infection (65), while the multifunctional RBP PCBP1, along with hnRNPs has been shown to be implicated in translational control of many viruses, including poliovirus, human papilloma virus and Hepatitis A virus. Cluster 6 is comprised of RBPs which preferentially bind to the 5' UTR of SARS-CoV-2. Interestingly, these proteins (AQR, GPKOW, SF3A3, SF3B4 and A2AF2) are known to be functionally involved in splicing and harbour a RNA recognition motif (RRM) (85). We find that cluster 6 also harbors NONO, a member of the paraspeckle complex, which has previously been associated with antiviral immune response and which is part of the RBP interactome in SINV infected cells (21), as well as TARDBP, a protein that localizes to P-bodies and stress granules and was shown to bind to the 5' UTR of SARS-CoV-2 in a recent study (60). Cluster 5 includes a large class of RBPs with diverse functions, including splicing (SRSF9), post-transcriptional repression (PUM2 and CAPRIN1), snoRNA binding (NOP58 and NIP7) and miRNA-mediated silencing (AGO1-3). These proteins were predicted to preferentially bind to the N and M genomic regions, while being depleted in the viral UTRs.

Lastly, binding of RBPs in cluster 7 and 8 is mostly concentrated in ORF7b as well as E and M protein regions, respectively. Besides the splicing regulators MBNL1 and SUGP2, cluster 7 contains the ELAVL2 and ELAVL3 RBPs involved in regulation of RNA stability (38). Previous studies have suggested that ELAVL human proteins might be affected during infections by the viral RNA that acts as a competitor to tritrate them away from their cellular mRNA targets (66). While most RBPs in cluster 8 were not found to be functionally related in literature, RBPs KHSRP and MATR3 have been shown to act as restriction factors in SINV infection (65).

### 2.4 Predicted RBP binding sites overlap with SECRETE motifs

Haimovich et al. (27) recently identified the presence of a unique *cis*-acting RNA element, termed "SECRETE" motif, which consists of 10 or more consecutive triplet repeats, with a C or a U present at every third base, on the sequences of both (-) and (+)ssRNA viruses. In context of SARS-CoV-2, a total of 40 SECRETE motifs have been identified in the viral genome, with a total length of ~1.3 kilobase. This motif has been suggested to be important for efficient translation and secretion of membrane or ER-associated secreted viral proteins, as well as for viral replication centers (VRCs) formation. To investigate whether predicted binding sites identified in 2.2 coincide with SECRETE motifs, we obtained exact locations of all SARS-CoV-2 SECRETE motifs from (27), and subsequently intersected them with predicted RBP binding sites of all 84 high-quality models containing at least one binding site in SARS-CoV-2. We observed that a total of 61 RBPs (out of 84) have binding sites overlapping with SECRETE motifs. Further, 30 RBPs with at least 10% of their binding sites overlapping with SECRETE motifs were identified and are termed 'SECRETE-associated RBPs' subsequently. We find that SECRETE-associated RBPs are predominantly found in some clusters of Figure 3c (cluster 3 and 6-8), while showing an apparent depletion in others (cluster 1-2, Figure 3c). For instance, 5 (out of 9) SECRETE-associated RBPs (SF3B4, U2AF2, GPKOW, TARDBP and NONO) are found in cluster 6, with TARDBP and NONO being functionally associated to viral regulation (85; 65). Cluster 3 contains 5 (out of 12) SECRETE-associated RBPs, namely CSTF2, ELAVL4, HNRNPC, PTBP1 and QKI, each associated with multiple RNA functional processes, including RNA stability, 3'-end formation, splicing and translation (85). Cluster 8 harbors 4 (out of 9) SECRETE-associated RBPs (FUBP3, KHSRP, MATR3 and CPSF6), 3 of which (FUBP3, KHSRP, MATR3) have 25% or more of their binding sites overlapping with SECRETE motifs. KHSRP is an essential RBP involved in RNA localization, RNA stability and translation, while METR3 is a regulator of RNA stability. Interestingly, most of these factors have been previously associated to viral RNA regulation (85). Lastly, all 4 RBPs in cluster 7 (ELAVL2, ELAVL3, SUGP2 and MBNL1) appear to be strongly associated with SECRETE motifs, as more than 25% of their respective binding sites are overlapping genomic regions harbouring SECRETE motifs.

### 2.3 SARS-CoV-2 variants of concern show gain- and loss-of-binding events

Multiple waves of SARS-CoV-2 infections have spread across the globe, some of which resulted in the emergence of specific lineages of viral variants. The systematic sequencing of thousands of samples from infected patients enabled the description and categorization of the detected viral sequences, identifying numerous mutations in their sequence when compared to the initial SARS-CoV-2 reference genome. Some of the thus described strains have been experimentally characterized as more efficient than others, explaining in part their successful spread at local or global geographic scales (32; 84; 33). These strains have been defined by the World Health Organization as variants of concern, with "evidence for increased transmissibility, virulence, and/or decreased diagnostic, therapeutic, or vaccine efficacy" (67). Specific subsets of mutations have been associated with each variant of concern, when mutations were represented in a majority of sequenced samples of their lineage. Notably, a special focus has been given with regards to the impact of mutations occurring within the spike-encoding gene (50), owing its importance in the initial steps of viral infection and its potential for vaccine neutralization (31). However, due to a lack of appropriate methods, the impact of these mutations at the regulatory level, such as their impact on protein-RNA interactions, has so far been largely ignored.

## COMPUTATIONAL MAPPING OF THE HUMAN-SARS-CoV-2 PROTEIN-RNA INTERACTOME

280 To fill this gap, we systematically investigated the impact of observed mutations in viral variants of concern on the  
281 predicted binding of RBPs, in order to uncover potential viral hijacking of host proteins directly at the RNA level.

### 282 **A catalog of high-impacting variants across 11 viral strains**

283 We compiled a total of 290 mutations (193 unique mutations, 37 shared across strains) across 11 variants of concern,  
284 including alpha, delta, and omicron strains (Methods 3.11). For each variant and RBP, we evaluated the impact of  
285 the variant in terms of gain- or loss-of-binding by comparing the predicted binding probability of the reference and  
286 alternative allele (Methods 3.11.) Using pysster and DeepRiPe models across 87 RBPs, we obtained a total of 25,230  
287 impact scores, one for each pair of variant and RBP. Notably, three variants (3,037C>T, 14,408C>T, and 23,403A>G)  
288 are consistently found across all viral strains, and their highest absolute delta-scores were respectively associated to  
289 FTO (avg. decrease from 0.474 to 0.356), AQR (avg. decrease from 0.191 to 0.036), and NONO (avg. increase from  
290 0.086 to 0.340). In order to prioritize pairs of variants and RBPs that show a gain- or loss-of-binding, we select a  
291 sub-set of pairs for which either the reference *or* alternative allele pass our binding thresholds (Methods 3.9). Note that  
292 this filter applies a XOR operation, i.e. we are interested in events that lead to either gain- or loss-of-binding (GOB,  
293 LOB). Overall, a total of 315 GOB or LOB events passed the above filter and are depicted in Figure 4a. The majority  
294 of variants introduced small delta in prediction scores, with less than 20% (61) of absolute delta-scores above 0.233  
295 (Figure 4a). As shown in the Supplementary Figure 2a, the top 20% highest-impact variants from Figure 4a accumulate  
296 in different genomic annotations over the SARS-CoV-2 genome. Interestingly, among the RBPs impacted by these  
297 mutations, we find that some strains present multiple high-delta-score mutations for SRSF7 (strains delta, kappa) and  
298 YBX3 (strain lambda), as well as L1RE1, RBPMS, SND1, ZRANB2 (strain omicron) (Supplementary Figure 2b).  
299 Additionally, the omicron strain harbors a particularly large number of variants predicted to impact binding of ORF1  
300 protein (from LINE-1 retrotransposable element).

### 301 **Systematic point-wise *in silico* mutagenesis reveals hypothetical high-impact variants**

302 New viral strains are continuously emerging, some of which are characterized by a faster spread due to newly acquired  
303 sequence variants, highlighting the importance of a continuous monitoring of viral variants which may result in a  
304 selective advantage on the protein or RNA regulatory level. To anticipate and quantify the impact of potentially  
305 unobserved variants, we perform a systematic *in silico* mutagenesis by generating all possible point mutations across  
306 the SARS-CoV-2 genome and score each hypothetical mutation with respect to its impact on RBP binding. Figure 4d  
307 and 4e show exemplary *in silico* mutation tracks for PUM2 and FTO, respectively, with observed reference prediction  
308 scores depicted at the top and the impact of gain- and loss-of-binding variants shown at the bottom. Note that for  
309 visualization purpose, only the delta score of the alternative allele with the highest impact is shown for each position  
310 and RBP. Supplementary Figure 3 shows an impact catalogue of  $29,903 \times 63$  single-nucleotide variants across all  
311 SARS-CoV-2 genome positions and 63 pysster models. The complete set of hypothetical variants together with their  
312 impact scores is available at <https://sc2rbpmap.helmholtz-muenchen.de/>.

### 313 **High-impact sequence variants disrupt known RBP-binding motifs**

314 As *in vivo* RBP-binding is usually driven via the recognition of short sequence motifs, we investigated whether  
315 high-impact variants cause gain or disruption of known binding motifs. To this end, we gathered from each strain  
316 the top 10 variants with highest absolute delta-scores, as illustrated in Figure 4b and 4c for strains alpha and delta,  
317 respectively. This represented a total of 69 unique mutation-RBP pairs, 19 of which were found in more than one  
318 strain. As expected, the majority (54 / 69) of their delta-scores is found to be in the top 1% of the distributions from the  
319 *in silico* mutagenesis. We then computed feature attribution scores (Methods 3.10), centered at the position of each  
320 high-impact variant. Feature attribution maps for the subset of candidate high-impact variants of the alpha and delta  
321 strain are shown in Figure 4b and 4c, respectively. Indeed, we observe that variants with high negative delta score  
322 tend to disrupt known binding motifs of human RBPs. For instance, transition T>G at position 22,917, as seen in the  
323 delta strain (Figure 4c) (as well as in top mutations from epsilon and kappa strains) decreases the prediction score for  
324 PUM2 from 0.795 to 0.158, with only 0.0015% *in silico* variants showing a lower delta-score. As is clearly visible  
325 from the feature attribution analysis (Figure 4c; middle-right), the variant disrupts the well-known PUM2 binding motif  
326 TGTATAT. In a similar manner, transversion A>T at position 23,063 from the alpha strain (Figure 4b; also found in top  
327 mutations from beta, gamma, and mu strains) decreases the prediction score for QKI from 0.488 to 0.049, with 0.006%  
328 *in silico* mutations show a low delta-score. Here, the feature attribution profiles clearly highlight how the known QKI  
329 binding motif ACTAA was detected by the model in the reference sequence, and how the mutation leads to a loss of  
330 this motif. Lastly, the transversion G>C at position 28,280 in the alpha strain (Figure 4b) decreases the prediction score  
331 for FTO binding from 0.679 to 0.209, and only 6 (0.00007%) *in silico* mutations show a delta-score lower than the one  
332 observed (Figure 4d). Although no clear motif is found within the window, the heights of the nucleotides at the position  
333 of the mutation are reduced compared to the reference sequence, reflecting the decreased prediction score.



## COMPUTATIONAL MAPPING OF THE HUMAN-SARS-CoV-2 PROTEIN-RNA INTERACTOME

### 334 **High-impact gain- and loss-of-binding events across viral strains**

335 Among the above set of top 10 highest impact variants per viral strain, we select those that conform to strict gain-or  
336 loss-of-binding (Methods 3.11). We identify a total of 23 (out of 69) change of binding events across 17 variants and  
337 13 RBPs (Table 1). The first example corresponds to a transversion G>T at position 210 in the 5'UTR from the delta  
338 and kappa strains, predicted to induce a loss-of-binding for SRSF7, which we had confirmed from the loss of binding  
339 motif (delta strain heatmap, see Figure 4c). Further, from the ORF1ab gene, two examples of a loss of binding for  
340 RBM20 by the C>T transition at position 3,267 (strain alpha), and a gain of binding of RBM22 from a C>T transition at  
341 position 18,877 (strain mu). From the S gene, a gain of binding is reported for HNRNPC, induced by a C>T transition  
342 at position 21,575 (strain iota), in addition to another gain of binding reported for SF3A3, from a C>A transversion  
343 at position 22,995 (strain omicron). Two mutations occurring in the ORF3a gene are passing our filters for two RBP  
344 impacts: the transition C>T at position 25,469 induces a gain of binding for HNRNPC in delta and kappa strains, while  
345 the G>T transversion at position 25,563 induces a loss of binding for FTO in strains beta, epsilon, iota and mu. Finally,  
346 in the N gene, we report three mutations, two of them impacting FTO binding (one gain in the eta strain, from a deletion  
347 at position 28,278; one loss in the alpha strain, from a G>C transversion at position 28,280), and a loss of binding of  
348 ORF1 protein (from LINE-1 retrotransposable element) in the eta strain, from a A>G transversion at position 28,699.

### 349 **Individual variants impact binding of several RBPs**

350 Among variants that surpass binding-sites thresholds and lead to either gain- or loss-of-binding (Methods 3.11), several  
351 variants impact RBP binding of multiple RBPs simultaneously. For instance, a deletion at position 22,299 (S gene)  
352 identified in the lambda strain, is predicted to induce a gain of binding for ELAVL1, U2AF2, and GPKOW, while  
353 inducing a loss of binding for SF3B4, SF3A3, and MBNL1. Interestingly, all these factors are associated with splicing.  
354 Notably, the MBNL1 loss is also detected in the beta strain, through a deletion happening in a close-by location (at  
355 position 22,281, S gene), suggesting those two mutations may have been retained due to beneficial induction of similar  
356 changes in binding patterns. Another mutation which impacts multiple RBPs is the transition G>A at position 23,048 (S  
357 gene) from the omicron strain, predicted to induce binding of the ORF1 protein from LINE-1 retrotransposable element,  
358 as well as of SND1. Comparably to the MBNL1 impact, two close-by mutations from omicron were associated with a  
359 gain of ORF1 binding (transversion A>C at position 23,013, and transition A>G at position 23,040), further suggesting  
360 joint impact of these mutations on ORF1p binding. The last case of mutations with impact on multiple RBPs concerns a  
361 set of 2 mutations: C>A transversion and C>G transversion at position 23,604, in the S gene. The first is found in alpha  
362 and mu strains, while the second is found in the delta and kappa strains. Both mutations are predicted to induce a gain  
363 of SRSF7 binding, which is visualized for the alpha strain on Figure 4b through feature attribution maps.

### 364 **2.4 RBP-binding across human coronaviruses**

365 While evaluation of impact for reported variants enables the monitoring of potentially functional changes in the SARS-  
366 CoV-2 genome, evaluating changes in binding sites at longer evolutionary time scale might highlight more fundamental  
367 properties of the SARS-CoV-2 virus, as compared to other RNA viruses infecting human. We investigated to which  
368 extent binding sites of human RBPs are conserved across related human coronaviruses. For this purpose, we obtained  
369 genomes and genomic annotations of 6 SARS-CoV-2-related human coronaviruses, namely SARS-CoV-1, MERS,  
370 HCoV-OC43, HCoV-NL63, HCoV-HKU1, HCoV-229E (Methods 3.13). Binding sites were identified in analogy to  
371 SARS-CoV-2 (Methods 3.9) across each viral genome using 87 high-confidence pysster and DeepRiPe models. Figure  
372 5a shows the general binding propensity of RBPs across viral genomes of the 7 coronaviruses. Overall, RBP binding is  
373 conserved across coronaviruses, with the highly pathogenic viruses (SARS-CoV-1, SARS-CoV-2 and MERS) showing  
374 a highly similar binding pattern. Further, a total of 86 (out of 87) RBPs (except FKBP4) were predicted to harbor a  
375 binding site in at least one coronavirus, with only a small variability in the total number of binding RBPs between  
376 individual viruses. However, we observe a greater variability of RBP binding within shared genomic regions across  
377 coronaviruses, for instance in the 5' and 3' untranslated regions (UTRs). Viral UTRs are known to play an important  
378 role in both pro- and anti-viral responses and recent evidence suggests that evolution of the 3' UTR is contributing  
379 to increased viral diversity (15). Indeed, the 3' UTR of SARS-CoV-2 shows a severe truncation when compared to  
380 SARS-CoV-1 and MERS. Given that viral UTRs are not under selective pressure with respect to a translated protein,  
381 they might be more prone to acquire mutations that modulate regulation through host RBPs. Figure 5b and 5c show  
382 RBP binding to the 3' and 5' UTRs across selected coronaviruses, respectively. While SARS-CoV-1, SARS-CoV-2  
383 and MERS show conserved binding on the 5' UTR and cluster closely, a depletion of RBP binding sites is observed in  
384 the 3' UTR of SARS-CoV-2 when compared to SARS-CoV-1 and MERS. To investigate gain-and loss-of-binding in  
385 viral UTRs across the severe pathogenic human coronaviruses SARS-CoV-1, SARS-CoV-2 and MERS, we performed  
386 multiple sequence alignment of the viral 3' and 5' UTRs and compared the predicted binding score profiles across the  
387 three viruses (Methods 3.13).



## COMPUTATIONAL MAPPING OF THE HUMAN-SARS-CoV-2 PROTEIN-RNA INTERACTOME

### 388 **Loss of FXR2-binding in SARS-CoV-2 3' UTR**

389 Figure 5e shows 3' UTR binding of FXR2, a paralog of FMRP (fragile X mental retardation protein). Our model  
390 predicted extensive binding of FXR2 along the 3' UTR of SARS-CoV-1 and MERS, while SARS-CoV-2 showed a  
391 complete lack of predicted FXR2 binding sites, owing to its significantly shorter 3' UTR. On the other hand, Figure 5g  
392 shows that FXR2 binding is conserved in the 5' UTR of SARS-CoV-1 and SARS-CoV-2. FMRP was previously shown  
393 to broadly bind along the entirety the 3' UTR of the Zika virus (ZIKV) (74). However, while FMRP was suggested to  
394 act as a ZIKV restriction factor by blocking viral RNA translation, a significantly reduced ZIKV infection was observed  
395 upon knockdown of FXR2 (74).

### 396 **Conserved FTO binding site in the 3' UTR of SARS-CoV-1 and SARS-CoV-2**

397 Altered expression levels of methyltransferase-like 3 (METTL3) and fat mass and obesity-associated protein (FTO)  
398 have been recently linked to viral replication (99). FTO is a demethylase (eraser) enzyme with enriched binding in the  
399 3' UTR of mRNAs in mammals (58). FTO has previously been suggested as a potential drug target against COVID-19  
400 (97), as targeted knockdown has been shown to significantly decrease SARS-CoV-2 infection (99; 97; 6). Therefore, we  
401 investigated predicted binding of FTO to the 3' UTR of SARS-CoV-2 and related viruses. Indeed, we observed that  
402 SARS-CoV-1, SARS-CoV-2 and MERS, as well as the less pathogenic viruses HCoV-HKU1 and HCoV-OC43 harbor  
403 at least one FTO binding site in their 3' UTR (Figure 5b). Further, Figure 5d shows that while SARS-CoV-1 and MERS  
404 harbor multiple shared FTO binding sites along their 5' UTR, SARS-CoV-2 only harbors one FTO binding site at the 3'  
405 end of its 5' UTR which is exclusively shared with SARS-CoV-1.

### 406 **Newly acquired TARDBP binding in the SARS-Cov-2 5' UTR**

407 We next focus on TARDBP (also known as TDP-43) (Figure 5f), which was predicted to bind the 5' UTR of a  
408 SARS-CoV-2 mutant in a recent study (60). TARDBP, a host protein implicated in pre-mRNA alternative splicing, has  
409 been shown to play a role in viral replication and pathogenesis in the context of coxsackievirus B3 infection (42). In  
410 contrast to the findings of Mukherjee et al. (60), our model identified a TARDBP binding site at the genomic range of  
411 89-98 in the wild-type reference of SARS-CoV-2. Interestingly, in addition to observing a lack of predicted binding  
412 signal of TARDBP on the 5' UTR of SARS-CoV-1 and MERS, we found a complete lack of TARDBP binding to the 5'  
413 UTR of any of the other investigated coronaviruses (Figure 5c). This suggests that 5' UTR TARDBP binding potential  
414 is newly acquired in SARS-CoV-2 and may affect its virulence.

### 415 **2.5 A functional catalog of human RBPs with predicted SARS-CoV-2 interaction**

416 To understand the functional impact of RBPs on the SARS-CoV-2-mediated COVID-19 disease, we set out to interrogate  
417 the breadth of publicly available OMIC research, thereby gathering supportive evidences for our 87 RBPs models  
418 (Figure 6). To this end, we collected 97 data sets of experimental research results from 22 studies (Methods 3.15)  
419 covering experimentally determined and predicted viral RNA - host RBP interactions as well as multi-level (OMICS)  
420 data related to SARS-CoV-2 cell line infections, shedding light on viral entry, protein-protein interactions and host cell  
421 regulation. Studies which are closer to disease phenotypes, like CRISPR cell survival assays and COVID-19 patient  
422 data, were also included. In addition, we collected evidence of direct involvement of RBPs in SARS-CoV-2 infection,  
423 as reported in the SIGNOR database, a manually curated resource of pathways and genes involved in SARS-CoV-2  
424 (49). All data sets were harmonized and integrated through the use of knowing01 (kno) software to annotate RBPs by  
425 automated mapping of gene, variant and protein identifiers, yielding reported evidence of binding or regulation for 85  
426 out of 87 (97.7%) RBPs models.

427 We found that a large fraction (63 out of 87, 72.4%) of RBPs were identified to directly bind SARS-CoV-2 RNA  
428 using affinity-purification methods (69; 18) (Figure 6), validating the interaction of these RBPs with the viral RNA.  
429 Interestingly, only 32 out of 87 RBPs (36.8%) have previously had reported binding sites profiles over the SARS-CoV-2  
430 genome by related methods catRAPID (87) or PRISMNet (80). We thus complement the knowledge on binding site  
431 locations over SARS-CoV-2 RNA with 55 RBPs uniquely explored by our framework, 36 of which are experimentally  
432 supported for viral RNA interactions (labeled as 'NOVEL validated', Figure 6). Our holistic comparison revealed  
433 that the majority of explored RBPs (75, 86.2%) were previously reported to be part of host-pathogen PPI networks  
434 and cellular pathways which are altered during infection by either SARS-CoV-2, SARS-CoV-1 or both (Figure 6). In  
435 addition, 34 out of the 87 (39.1%) were identified as essential genes in CRISPR knock-out screenings, highlighting the  
436 importance of RBPs in the infection process, immune response and viral replication, through direct interaction with  
437 the viral genome. Although no RBP co-localizes with loci associated to COVID-19 severe disease courses (GWAS)  
438 under genome-wide significance, we identified 44 (50.6%) RBPs with nominal significance. When considering the  
439 total of 2,730 coding genes co-localizing nominally associated loci, this represents a significant enrichment for RBPs

## COMPUTATIONAL MAPPING OF THE HUMAN-SARS-CoV-2 PROTEIN-RNA INTERACTOME

440 (odds ratio of 7.8, Fisher test p-value  $<2.2e-16$ ), suggesting their importance in patient's course. Finally, a small set  
441 of our predicted-binding RBPs was shown to be supported only from CRISPR screens or found deregulated across  
442 COVID-19 patients, without evidence of viral RNA binding from previous studies, neither functional evidence in  
443 molecular networks altered by SARS-CoV-2 infection (labeled as 'NOVEL & disease relevant', Figure 6). Taken  
444 together, the large overlap between the RBPs we selected and the different resources considered confirms that hijacking  
445 host RBPs is crucial to the infection life cycle of the virus, through the direct binding of these RBPs to the viral genome  
446 only or in combination with host-pathogen protein-protein interactions.

## 447 **3 Material and Methods**

### 448 **3.1 ENCODE data and preprocessing**

449 Enhanced CLIP (eCLIP) datasets were obtained from the ENCODE project database, which comprises 223 eCLIP  
450 experiments of 150 RBPs across two cell lines, HepG2 and K562. For RBPs with experiments in both cell lines, we  
451 selected only data of eCLIP experiments from the HepG2 cell line for downstream analysis, as those were demonstrated  
452 to yield higher performing models (compared to K562) in previous studies (5). Narrow peaks of each eCLIP library  
453 were taken directly from ENCODE and preprocessing was performed as follows: for each of the two replicates of a  
454 given eCLIP experiment, peaks were first intersected with mRNA locations obtained from the GENCODE database  
455 (Release 35) and only overlapping peaks were retained. Next, the 5'-end of each peak was defined as the cross-linked  
456 site, as it usually corresponds to the highest accumulation of reverse transcription truncation events. A 400bp window  
457 was then centered around the cross-linked site for each peak, defining the input window of the downstream model.  
458 Input windows of both replicates were intersected reciprocally with a required overlap fraction of 0.75, ensuring that  
459 only those peaks which are present in both replicates are considered for downstream training set construction. Finally,  
460 the top most 50,000 windows with a read-start count FC of 2.0 above the control (SMInput) experiment were selected  
461 for each RBP.

### 462 **3.2 Pysster training set construction**

463 For each RBP, a classification dataset of bound (positive) and unbound (negative) RNA sequences was constructed.  
464 Positive samples were obtained by taking corresponding 400nt peak-region windows from the previous step (3.1), while  
465 two distinct sets of negative samples were generated. First, 400nt long regions which did not overlap with binding sites  
466 of the given RBP were sampled from transcripts harboring at least one binding site. This constraint ensures that the  
467 transcript is expressed in the experimental cell type and would not be observed as RBP-binding in other cell types. The  
468 second set of negative samples was generated by randomly sampling binding sites of other RBPs. This ensures that  
469 any CLIP-seq biases (such as U-bias during UV-C cross-linking (79), (93)) are present in both positive and negative  
470 samples and prevents the model from performing a biases-based sample discrimination during the training. Together,  
471 this yields a three-class training set, where class 1 corresponds to positive samples and class 2 and 3 correspond to  
472 negative samples. Samples of class 2 and 3 were sampled at a 3:1 ratio with respect to class 1. Finally, generated  
473 samples were randomly split into train, validation and test sets at a ratio of 70:15:15, respectively.

### 474 **3.3 Pysster model**

475 The *pysster* Python library (5) was used for implementation of the model which consists of three subsequent one-  
476 dimensional convolutional layers, each with 150 filters of size 18, followed by a single fully connected layer with 100  
477 units. The ReLU activation function is applied to each intermediate layer output and a maximum pooling layer is added  
478 after every convolutional layer. Finally, a fully connected layer with 3 units, one for each of the three output classes, is  
479 added. Dropout (75) with a rate of 0.25 was applied to each layer, except for input and output layers. The model was  
480 trained with the Adam optimizer (41) using a batch size of 512 and a learning rate of 0.001. For each RBP, we trained  
481 for at most 500 epochs and stopped training in case the validation loss did not improve within the last 10 epochs.

### 482 **3.4 Pysster binary classification threshold**

483 As *pysster* models are trained as a 3-class classification problem with class imbalance, we re-calibrate each model for  
484 the binary classification task by introducing a binary decision threshold  $t_m$  on the predicted positive-class probability  
485 scores. For each model  $m$ ,  $t_m$  is defined as the threshold which maximizes the F1 performance (Section 3.7.1) of  
486 the model with respect to bound vs. unbound binary classification obtained by pooling class 2 and 3 samples into a  
487 common 'unbound' class. This threshold is used to identify bound regions in the viral sequence (Section 3.9).

### 488 **3.5 DeepRiPe model**

489 We obtained pre-trained DeepRiPe models from Ghanbari et al. (23) and retained models for 33 out of the 59 RBPs,  
490 filtering out models where no informative sequence motif could be learned by the model. The PAR-CLIP-based models  
491 used in this study are modified versions of the DeepRiPe neural network, where only the sequence module to extract  
492 features from the RNA sequence is used. Briefly, the model consists of two convolutional layers, one fully connected  
493 layer and one output layer that contains  $k$  sigmoid neurons to predict the probability of binding, one for each RBP. Each  
494 convolutional layer has a rectified linear unit (ReLU) activation, followed by a max pool layer and a dropout layer  
495 with probability of 0.25. 90 filters with length 7 and 100 filters of length 5 for the first and second convolution layers,

## COMPUTATIONAL MAPPING OF THE HUMAN-SARS-COV-2 PROTEIN-RNA INTERACTOME

496 respectively. The fully connected layer has 250 hidden units and a ReLU activation. Details in data preparation and  
497 model training are outlined in Ghanbari et al. (23).

### 498 3.6 Single-nucleotide predictions

499 The pysster and DeepRiPe positive-class prediction score corresponds to the probability that input RNA sequence is  
500 bound by the RBP of interest. By design, this score is assigned to the entire input sequence, although RBP binding  
501 sites are much more local, usually spanning only a few nucleotides (14). To obtain single-nucleotide binding site  
502 probabilities from both pysster and DeepRiPe models along an RNA sequence, we employ a one-step sliding-window  
503 approach to scan over a given RNA sequence, where the predicted positive-class probability score is assigned to the  
504 center nucleotide of the input window. In order to obtain predictions over the entire RNA sequence, the 5' and 3'  
505 sequence ends are 0-padded.

### 506 3.7 Pysster performance evaluation and model selection

#### 507 3.7.1 Precision-recall and F1 performance

508 As the validation loss was monitored for the purpose of early-stopping, the precision-recall (PR) and F1-score  
509 performance of the pysster models was evaluated on the test set. Models with an area under the PR curve (auPRC) of  
510 less than or equal to 0.6 were deemed poor quality and thus excluded from the downstream analysis.

#### 511 3.7.2 Performance in practice

512 Training datasets are sampled at a fixed positive-negative ratio which hardly reflects the ratio of bound and unbound sites  
513 of RNA transcripts found *in vivo*. In practice we expect that for some transcripts regions, binding sites of a particular  
514 RBP are not observed over several kilo-bases, while other regions, such as 5' and 3' untranslated regions (UTRs), might  
515 harbor a dense clustering of binding sites. To measure the ability of pysster models to accurately predict *de novo* RBP  
516 binding-sites along whole-length RNA transcripts, we introduce the concept of Performance-In-Practice (PIP), which  
517 measures how well the single-nucleotide prediction score of the model correlates with binding sites identified by eCLIP.  
518 For a given RNA sequence, the PIP of a model is defined as the Spearman correlation coefficient (SCC) between the  
519 truncated prediction scores  $p_i^{trunc}$  and a binary vector obtained by labeling all positions that fall within eCLIP binding  
520 sites with 1 and 0 otherwise. Here,  $p_i^{trunc}$  refers to a modified version of the prediction score  $p_i$  defined as

$$p_i^{trunc} = \begin{cases} p_i, & \text{if } p_i \geq t_m \\ 0, & \text{otherwise} \end{cases}$$

521 where  $t_m$  is a threshold obtained for each model as outlined in Section 3.4. For each model, we perform extensive PIP  
522 analysis on the human transcriptome as follows. First, we select the set of transcripts which contain at least one binding  
523 site for it. From this set, we uniformly draw 100 transcripts without replacement as hold-out transcripts. Subsequently,  
524 we intersect positive and negative training samples with the hold-out transcripts and discard all samples that overlap  
525 with any of the hold-out transcripts before retraining pysster on the remaining training samples. We use the resulting  
526 models to predict along the hold-out transcripts as described in Section 3.6 and compute the PIP score for each hold-out  
527 transcript. Finally, models with a median PIP score of less than or equal to 0.1 were excluded from downstream analysis.

### 528 3.8 Estimating significance of prediction scores

529 To directly control the false positive rate of binding site prediction from both pysster and DeepRiPe models on the  
530 viral genome, we estimate prediction score significance via an RNA sequence permutation test. In order to obtain a  
531 null-distribution of predictions (positive-class) scores, we first compute the di-nucleotide frequencies on the viral RNA.  
532 Next, we perform frequency-weighted sampling of di-nucleotides to construct a set of  $N = 10,000$  null-distributed  
533 inputs. Null-distributed prediction scores for each model are then obtained by predicting on those sequences. A p-value  
534 is assigned to each observed prediction score  $p_i$  in the viral sequence by computing the fraction of scores from the null  
535 distribution  $p_j^{null}$  for which  $p_j^{null} > p_i$ ,  $j = 1, \dots, N$ .

### 536 3.9 Identifying RBP binding sites

537 We identify RBP binding sites on the viral RNA sequence using predicted single-nucleotide binding probabilities  
538 (Section 3.6) together with estimated p-values (Section 3.8). For each pysster model, we classify nucleotides in the viral  
539 RNA as "bound" if the predicted probability score is equal or greater than the estimated binary threshold  $t_m$  (Section



## COMPUTATIONAL MAPPING OF THE HUMAN-SARS-CoV-2 PROTEIN-RNA INTERACTOME

540 3.4) and the score is found to be significant ( $p < 0.01$ ). Regions with a consecutive stretch of bound nucleotides of  
541 at least length 2 are then defined as a RBP binding site. Neighboring binding sites that are spaced by less than 10  
542 nucleotides are merged to a single binding site. Note that for DeepRiPe models, nucleotides in the viral RNA are  
543 considered "bound" if the probability score is found to be significant ( $p < 0.01$ ) and no score threshold is applied.

### 544 3.10 Base-wise feature attribution via Integrated Gradients

545 To gain insight into which RNA sub-sequences are driving factors for RBP binding, we compute sequence importance  
546 scores using Integrated Gradients (IGs) (81; 23). Starting from an input baseline, IG performs a step-wise linear path  
547 interpolation between the baseline and the actual input sequence and computes the gradients of the interpolated inputs  
548 with respect to an output neuron. That is, we obtain a vector of importance scores over the input sequence which  
549 indicate which nucleotides of the input contributed most toward the prediction. Here, we choose the 0-vector (i.e. the  
550 one-hot encoding of all nucleotides is set to 0) as the baseline and perform 50 baseline-input interpolation steps. To  
551 obtain sequence importance scores for a given binding site, we compute IGs with respect to an input window centered  
552 around the binding site. For sequence-motif construction, the heights of nucleotides in the input sequence is given by  
553 the feature attribution weights.

### 554 3.11 Analyzing mutations in variants of concern

555 Variant information of 11 SARS-CoV-2 viral variants (alpha, beta, delta, epsilon, eta, gamma, iota, kappa, lambda,  
556 mu, omicron) was obtained from the UCSC genome-browser for the SARS-CoV-2 virus (17), and converted into VCF  
557 format. For each strain, we first created a 'mutated' strain-specific genome, using the viral reference sequence and the  
558 set of strain-defining variants. We then center a window at the reference position of each genomic variant and extract  
559 the mutated sequence for subsequent prediction via each model. We note that for cases where genomic variants are  
560 in close proximity with each other, extracted windows might contain multiple mutations. This is crucial, as only the  
561 combination of multiple variants might lead to gain or loss of RBP binding. The resulting prediction score on each  
562 alternative allele (ALT) is then compared with the prediction score of the same window on the reference sequence  
563 (REF). To quantify the impact of each mutation, we compute a *delta* score between the prediction score of ALT and  
564 REF sequence:

$$\Delta_{score} = score_{ALT} - score_{REF}. \quad (1)$$

565 Mutations with a positive delta score sign represent 'gain-of-binding' (GOB) events, while mutations with negative sign  
566 represent 'loss-of-binding' (LOB) events. To further narrow down the set of mutations, we compile a subset of mutation  
567 that lead to a gain- or loss-of-binding (GOB and LOB), defined as instances where (in case of LOB) the REF score  
568 is passing the binding site score threshold and p-value (Sections 3.4 and 3.8) while the ALT does not, or vice versa  
569 (in case of gain of binding). As for binding site calling (Section 3.9), we use a significance level of 0.01 as p-value  
570 threshold for both pysster and DeepRiPe models.

### 571 3.12 *In silico* mutagenesis

572 We perform *in silico* probing of the effects of all possible point-mutations on RBP binding across the SARS-CoV-  
573 2 genome. At each viral genome position, the reference base was mutated to each of the three alternative bases.  
574 Subsequently, prediction was performed on the input windows derived from each ALT allele using all high-quality  
575 pysster models. Finally, as described in Section 3.11, an impact score is computed and a set of change-of-binding  
576 mutations is compiled.

### 577 3.13 Comparative analysis of human coronaviruses

578 Besides SARS-CoV-2, we obtained reference sequences for 6 other human coronaviruses, including SARS-CoV-1,  
579 MERS, HCoV-229E, HCoV-HKU1, HCoV-NL63 and HCoV-OC43 from NCBI (68). Using high-quality models from  
580 both pysster and DeepRiPe (Section 3.7), we perform single-nucleotide binding prediction along each viral RNAs  
581 (Section 3.6). Next we compute prediction empirical p-values for each viral sequence (Section 3.8) by generating a  
582 dedicated null distribution of scores for each virus and RBP. RBP binding sites across viruses were then identified as  
583 described in Section 3.9. We evaluate genomic-element preference across a subset of shared viral genomic locations  
584 (ORF1ab, E, N, M, S, 5' UTR, 3' UTR) for each RBP and virus by intersecting the predicted set of binding sites of  
585 each virus with its RefSeq annotations. To compute multiple sequence alignments (MSA) between genomic elements  
586 of betacoronaviruses, we use the ClustalO (72) algorithm with default parameters.

## COMPUTATIONAL MAPPING OF THE HUMAN-SARS-CoV-2 PROTEIN-RNA INTERACTOME

### 587 **3.14 Functional annotation of RBPs**

588 To assess the potential role of RBPs with predicted binding on viral RNA sequences, we manually curated all RNA-  
589 related functions of the 87 RBPs with good predictive models using the GeneCards, Uniprot and RBP2GO databases  
590 (77).

### 591 **3.15 Public COVID-19/coronaviruses OMICS data**

592 To assess regulatory information of RBPs across available coronavirus/COVID-19 multiOMICS data, we downloaded  
593 evidence from 22 studies. We imported study-relevant supplementary tables via knowing01, which harmonizes data  
594 tables and links results to molecular information, like human gene symbols, UniProt identifier, variant positions as  
595 available in the proprietary CellMap unified data model (Version 2022/03). A list of 87 RBPs with good model  
596 performance were loaded as list of Gene Symbols. To ensure that all RBP human gene symbols are identically named  
597 in African Green Monkey OMICS data, we used VeroE6 cells linked to human symbols.

598 A total of 97 research results were grouped into the following study types:

- 599 • extended interactomes from experimental determined of host RBP-SARS-CoV-2 interactions using affinity  
600 purification and mass spectrometry (18; 69; 89)
- 601 • computational predictions of host RBPs- SARS-CoV-2 interactions in the 5' UTR, 3' UTR and Spike S  
602 genomic region of the viral RNA with either catRAPIDomics (87) or the PRISMNet tool (80)
- 603 • viral-host protein-protein interactions (PPIs) measured by affinity-purification followed by mass spectrometry  
604 (24; 78)] and yeast two hybrid screenings (40)
- 605 • multiOMICS data, including the regulation of the host proteomics, phosphoproteomics, ubiquitinomics and  
606 transcriptomics up to 24 hours after coronavirus infection (4; 78), as well as the effectome, which includes  
607 deregulated host proteins 72 hours after SARS-CoV-2 induced expression of each of the viral proteins (78)
- 608 • CRISPR phenotype screens probing cell survival few days after viral infection with single genes knockouts in  
609 human (24; 30; 70; 91) or African green monkey [(92)] cell lines
- 610 • genome-wide association studies (GWAS) linking human genetic variation to COVID-19 disease severity (64)
- 611 • patient OMICS data, including proteomics and transcriptomics regulation of whole blood, serum or plasma of  
612 mostly inpatients (10; 12; 13; 22; 57; 63; 71; 95)

613 To filter for significant regulation in each data set, we applied significance cutoffs per study result. We chose to select  
614 two different significance levels to get lists of regulation with a stringent (adjusted p-value < 0.01) and a lax (adjusted  
615 p-value < 0.1) cutoff threshold, whenever available. Few data sets only provided raw p-values for which we used  
616 with lower cutoffs. Patient transcriptomics data were used with much lower cutoffs, due to the inflation of regulated  
617 genes on typical cutoffs. For GWAS data we employed a genome-wide (p-value < 5e-08) and nominal (p-value <  
618 0.01) significance cutoff, for stringent and lax cutoffs, respectively. Finally we annotated all 87 RPBs with regulated  
619 molecules via the knowing01 Annotate feature and visualized the number of evidences of RBPs in each data set in a  
620 count matrix.

## 621 4 Discussion

622 Strong evidence suggests that human RBPs are critical host factors for viral infection by SARS-CoV-2, yet there is no  
623 feasible experimental approach to map exact binding sites of RBPs across the SARS-CoV-2 genome systematically. To  
624 combat this knowledge gap, we constructed the first *in silico* human-virus RBP-RNA interaction map for SARS-CoV-2  
625 using predictions from pysster (5) and DeepRiPe (23) models trained on a large cohort of eCLIP and PAR-CLIP  
626 datasets, respectively. The use of high-capacity CNN classifiers represents a significant improvement over previous  
627 computational studies performing motif scanning over the SARS-CoV-2 genome (75; 3), as it enables the learning  
628 of more complex binding syntax and thus the detection of binding sites for RBPs with no cleanly defined sequence  
629 motif. This is evident by the fact that we observed high performance for RBPs without annotations of binding motifs  
630 in literature. On the other hand, we demonstrated that deep learning methods are by no means black boxes, as we  
631 recovered known binding motifs for several RBPs (including QKI, RBFOX2 and TARDBP) using gradient-based  
632 attribution methods. Together with stringent performance evaluation and conservative selection of high-quality models,  
633 these results suggest that our predictions represent bona fide binding sites. In a recent study, the PRISMNet deep  
634 learning model was used to infer binding of 42 host RBPs to the SARS-CoV-2 genome (80). However, predicted  
635 binding sites by PRISMNet are restricted to the 5' and 3' viral UTR regions are rather large, with some spanning over  
636 hundreds of nucleotides, while RBP binding usually only occurs across short stretches of RNA *in vivo*. In contrast, our  
637 approach generated single-nucleotide binding probabilities across the entire viral genome and may therefore yield a  
638 more complete picture of the binding landscape of human RBPs to SARS-CoV-2.

639 Our study identified known, as well as novel human RBPs to interact with SARS-CoV-2 (Figure 6). Further, the  
640 generated binding map provides a rich resource for future functional studies, in particular for investigating the role of  
641 the SARS-CoV-2 protein-RNA interactome in context of the viral life cycle. For instance, binding site predictions may  
642 be used to accelerate the discovery of host RBPs that engage in both pro- and anti-viral functions by directly interacting  
643 with the viral RNA. Further, predictions may aid in the identification of functional sites on the viral RNA that can  
644 be therapeutically targeted by RNA drugs, such as anti-sense oligonucleotides, to interfere with host RBP binding.  
645 In addition to constructing a RBP binding map on the SARS-CoV-2 reference sequence, we quantified the impact of  
646 sequence variant from 11 SARS-CoV-2 strains, including the alpha, delta and omicron viral strains.

647 Additionally, we applied a systematic *in silico* mutagenesis of all positions in the SARS-CoV-2 genome, pinpointing  
648 mutations associated with particularly high impact, which could represent potential high-risk variants to monitor in  
649 the future. Our analyses confirmed that our models can effectively be used to identify mutations with high-impact  
650 potential using the prediction scores, either for mutations observed in viral variants of concern (Figure 4a) or from *in*  
651 *silico* mutagenesis (Supplementary Figure 3). Such mutations can be evaluated further through the computation of  
652 attribution maps, highlighting important nucleotide in a given window of interest, and how their importance is impacted  
653 by the mutation. In previous studies variants of concerns have been prioritized through their potential impact on the  
654 sequence of viral proteins, in particular the Spike protein. Our results complement these findings, and enable to better  
655 understand the efficiency of specific lineages of SARS-CoV-2 in the context of RBP-viral RNA interactions, providing  
656 with a map of mutations of high potential for hijacking important host RBPs, or on the contrary evade binding of  
657 anti-viral RBPs. With our comparative analysis of RBP-RNA interactions across seven coronaviruses we contribute to  
658 the identification of genomic features and factors which confer unique characteristics to SARS-CoV-2 transmission  
659 and pathogenicity, compared to SARS-CoV-1, MERS, and less pathogenic coronaviruses. Both variants of concern  
660 and comparative analysis highlight gain- or loss-of-binding affecting host RBP-viral interactions and therefore pinpoint  
661 RBPs which can be prioritized for further screening.

662 We integrated knowledge of our predicted RBPs across other pathogens, host-viral protein-protein interactions, numerous  
663 studies collecting functional and phenotypic data, such as GWAS and CRISPR screens, as well as multi-omics COVID-  
664 19 patient data, in order to pinpoint RBPs with clinical significance. By this analysis, we mainly identify five sets  
665 of RBPs predicted to interact with the SARS-CoV-2 genome. The first set comprises core RBP predictions with  
666 numerous independent evidences in the scientific literature of their involvement in regulation of viral infection, included  
667 SARS-CoV-2. Proteins in this core set are confirmed by additional *in silico* methods, as well as experimental assays  
668 to bind SARS-CoV-2, and identified as deregulated or affected in multi-omics studies and/or CRISPR, GWAS and  
669 patient data of SARS-CoV-2 infection. Among them, we find several known regulators of viral processes, such as the  
670 hnRNPR viral restriction factors (65), the IGF2BP1-3 RBPs, which are mainly ubiquitinated during SARS-CoV-2  
671 infection (78) and linked, through GWAS, to poor disease outcome (34), as well as key regulators of SARS-CoV-2  
672 infections such as the stress granules-associated RBPs CAPRIN1 and KHDRBS1 (37), associated to pathways such  
673 as ER stress, Inflammation, cytokine storm and others (Supplementary Table 3), the pro-viral DDX3X factor (9) and  
674 the host factor NONO (65), previously shown to promote innate immune activation in HIV infection (44). Important  
675 regulators of mRNA splicing (QKI, PTBP1 and U2AF2), and other processes (TARDBP, TIAL1) are also part of this

## COMPUTATIONAL MAPPING OF THE HUMAN-SARS-CoV-2 PROTEIN-RNA INTERACTOME

676 group of RBPs. Notably, many of the RBPs we highlighted throughout our binding site analysis on the SARS-Cov-2  
677 genome, impacts from mutations in viral variants, or comparative genomic changes of binding sites fall into this group.  
678 For instance, TARDBP and QKI are two RBPs that are well supported, in particular through experimental identification  
679 of their binding to the viral RNA, in addition to OMICs support and CRISPR (TARDBP) or GWAS (QKI). We also  
680 identify TARDBP as a particularly important RBP in the context of SARS-CoV-2 infection due to the prediction of a  
681 unique binding site in the virus 5' UTR, when compared to SARS-CoV-1, MERS and other coronaviruses. A second  
682 set of RBPs comprises 36 proteins uniquely predicted by our framework as binders of SARS-CoV-2, which harbour  
683 experimental extensive support.

684 An example of RBP of interest in this group is the Serine/arginine-rich splicing factor 7 (SRSF7). Previous studies  
685 have shown that SRSF7 interacts with coronavirus RNA (76). It has also been suggested that this spliceosome protein  
686 could be sequestered by the viral genome, the later thus acting as a sponge through these putative binding sites, to alter  
687 host splicing processes. Among the high-impact mutations in the SRSF7 gene position 23,604 (S protein gene) is found  
688 mutated across multiple strains, with different alternative nucleotides: a C>A transversion is found in alpha and mu  
689 variants, while a C>G transversion is found in delta and kappa variants. Both mutations are associated to a positive  
690 delta score, therefore a gain of binding. This position has been suggested by previous studies to be a major driver of the  
691 increased infection efficiency of these viral variant, as a modifier of the S protein sequence (P680R) (52), although  
692 additional studies indicate that other mutations may be required for an actual effect ((53; 98)). The gain of binding we  
693 identify here could also suggest that the translation of the S gene into the protein is improved through the recognition of  
694 the newly created binding site by SRSF7.

695 Besides SRSF7, the large number of binding sites for splicing factors at the 5' UTR of the SARS-CoV-2 (cluster 6,  
696 Figure 3c) and the pervasive binding of several host and viral restriction factors (cluster 4, Figure 3c) suggests that  
697 these RBPs are likely to get sponged on the viral genome and by that modulate post-transcriptional regulatory networks  
698 in the host cell.  
699

700 One other interesting RBP in this group is represented by FXR2, paralog of FXR1 and FMR1 which are identified  
701 as direct binders of SARS-CoV-2 (Figure 6). Recent evidence suggests that FXR2 selectively interact with MERS viral  
702 proteins but not with viral proteins from SARS-CoV-1 and SARS-CoV-2 [(24)]. While we find evidence of FXR2  
703 binding along the SARS-CoV-2 genome, this is in agreement with the results of our comparative analysis with other  
704 human coronaviruses, where we observe extensive binding of FXR2 along the 3' UTR of SARS-CoV-1 and MERS, but  
705 depletion of FXR2 binding in the SARS-CoV-2 3' UTR. Together with the evidence of genetic association of FXR2 to  
706 COVID-19 disease severity (35) our findings suggest a fine-tuning role of FXR2 in regulating the severity of the infection.  
707

708 From these two sets, we can also highlight many RBPs with functions related to endoplasmic reticulum processes.  
709 SARS-Cov-2 utilizes the endoplasmic reticulum (ER)-derived double membrane vesicles (DMVs) as replication centers.  
710 RNA viruses, included SARS-CoV-2, contains several instances of an RNA regulatory motif, called SECRETE motif  
711 (27) which facilitates localization to the ER and increases viral protein translation, as well as viral replication. Such  
712 motif is also found in some human mRNAs encoding for proteins involved in innate immunity and associated with  
713 epithelial layers targeted by SARS-CoV-2. This suggests that host and pathogen might compete for ER-associated  
714 RBPs and this might make the host more vulnerable to the infection. Among our validated RBPs in set 1 and 2 (Figure  
715 6) we identified several SECRETE-associated RBPs, defined as those proteins where more than one fourth of their  
716 predicted binding sites overlapped instances of the SECRETE motif on the SARS-CoV-2 genome. These include  
717 FUBP3, KHSRP and MATR3, already identified previously as important host or restriction factors for other RNA  
718 virus infections (65). Interestingly, we linked MATR3 to several CRISPR studies showing that this factor is essential  
719 for SARS-CoV-2 replication, as well as to many nominal variants in all GWAS data (Figure 6). MATR3 physically  
720 interacts with G3BP1, another predicted RBP in this set which been found to interact specifically with SARS-CoV-2  
721 nucleocapsid (N) protein, control viral replication and localize (together with MATR3) at stress granules where G3BP3  
722 is taken away from its typical interactions partners (62). Our and previous data (Figure 3) suggest that direct binding of  
723 G3BP3 and MATR3 to the SARS-CoV-2 RNA could constitute an additional mechanism used by the virus to interfere  
724 with the G3BP3-MATR3 PPI network and impair stress granule formation. The fact that G3BP3 binding is enriched in  
725 correspondence of the gene encoding for protein N (Figure 3c) might also suggest a direct regulation of this transcript  
726 by this RBP in a sort of feedback loop manner.  
727

728 The other three sets of RBPs predicted to bind SARS-CoV-2 correspond to 1) proteins with *in silico* support from  
729 other predictive tools, but no experimental validation of direct binding to SARS-CoV-2 (named 'Predicted only');  
730 2) novel candidate SARS-CoV-2 binders, uniquely predicted by our method, no experimental validation but large  
731 functional support from host-pathogen PPI, CRISPR and patient omics data (named 'Novel infection relevant'), and 3)  
732 putative novel regulators that lack so far functional evidence across studies but were nonetheless found to be deregulated



## COMPUTATIONAL MAPPING OF THE HUMAN-SARS-CoV-2 PROTEIN-RNA INTERACTOME

733 in COVID-19 patients (named 'Novel disease relevant'). The fat mass and obesity-associated protein (FTO) is an  
734 example of a newly identified regulatory RBP for SARS-CoV-2. FTO is a demethylase (19), and while it has been  
735 suggested that the virus could hijack the host epigenome [(2)], a recent study showed that the viral genome itself  
736 was methylated (51), with a negative effect on viral replication efficiency. Besides the predicted binding pattern,  
737 FTO also presented numerous important gain-or loss-of-binding across many viral strains. Although there was no  
738 clear trend towards systematic loss of binding of FTO across the viral variants, we were able to point out multiple  
739 close-by mutations in the alpha variant that were associated to a significant loss, around the position 28,280 (Figure 4b).  
740 Finally, the FTO protein was identified as key risk factor for obesity, which is also a known risk for COVID-19 severity.  
741 FTO coding region harbored also nominal genetic associations to COVID-19 severity (variant lowest p-value 0.0053).  
742 Interestingly, FTO was additionally found to be significantly regulated on gene level in blood serum of patients admitted  
743 to ICU care (adj. p-value 7.72E-06) (63). A small set of novel predicted RBPs, with little to no experimental evidence  
744 across multiple functional studies, includes the ELAVL2-4 factors, the DND1 RBP and the splicing factors SRRM4  
745 and SF3A3 (Figure 6). Interestingly, ELAVL2-4 RBPs, found in our analysis to be SECRete motif-associated RBPs,  
746 and SRRM4 RBP are neuron-specific proteins and were found, through our integrative analysis, to be deregulated in  
747 COVID-19 patients. This points to novel promising candidates whose molecular mechanisms can be further investigated  
748 experimentally.

## COMPUTATIONAL MAPPING OF THE HUMAN-SARS-CoV-2 PROTEIN-RNA INTERACTOME

### 749 **5 Conclusion**

750 Viruses depend on essential host factors at all stages of their infection cycle. One family of host factors, RNA-binding  
751 proteins (RBPs), are involved in multiple aspects of post-transcriptional regulation and are characterized by their ability  
752 to bind to short RNA motifs. While several RBPs have been associated with SARS-CoV-2, some of which may represent  
753 drug-able targets for anti-viral therapy, cost and time constraints render a comprehensive experimental profiling of  
754 human RBPs to the SARS-CoV-2 RNA infeasible. To fill this knowledge gap, we instead identified binding of human  
755 RBPs to the SARS-CoV-2 genome computationally. Here, we used the pysster and DeepRiPe frameworks together with  
756 data from over 200 eCLIP and PAR-CLIP experiments to train RBP binding site predictors on the basis of convolutional  
757 neural networks (CNN). By applying stringent performance filters, we obtained a set of high-quality prediction models  
758 for 88 RBPs and created an *in silico* binding map of human RBPs along the SARS-CoV-2 genome at single-nucleotide  
759 resolution. Predicted binding profiles of RBPs suggested that groups of RBPs exhibit similar binding patterns on the  
760 viral genome and that RBPs within these group may be functionally related, for example, by being associated to the  
761 SECRETE motif important for efficient viral replication. We identify RBPs with clinical relevance, by analyzing our  
762 data in the context of functional and clinical studies, including genetic screens and COVID-19 patient data. We further  
763 utilized trained models to score the impact of strain-defining sequence variants across 11 SARS-CoV-2 strains. Several  
764 variants that result gain or loss of RBP-binding were identified, some of which simultaneously impact the binding of  
765 multiple RBPs or which are conserved in multiple viral strain. In addition to the analysis of observed variants, we  
766 quantified the impact of hypothetical variants by performing extensive *in silico* mutagenesis, generating all possible  
767 point mutations across the SARS-CoV-2 genome. We believe that this resource will greatly aid researchers in assessing  
768 the impact of newly identified viral variants. Finally, we predicted RBP-binding across 6 other human coronaviruses  
769 (including SARS-CoV-1 and MERS) and identified several conserved binding sites as well newly acquired binding sites  
770 in SARS-CoV-2.

771 All generated results, including fully trained models, predicted binding sites across SARS-CoV-2 and other coron-  
772 aviruses, variant impact scores across 11 viral strains and impact scores of hypothetical variants are publicly available  
773 at <https://sc2rbpmap.helmholtz-muenchen.de/>. We believe that our results give new insight into the role of  
774 RNA-binding proteins in context of SARS-CoV-2 infection and represents a rich resource for further research on how  
775 SARS-CoV-2 hijacks the host cell's RNA regulatory machinery for viral replication and evasion of immune response.

COMPUTATIONAL MAPPING OF THE HUMAN-SARS-COV-2 PROTEIN-RNA INTERACTOME

776 **References**

777 [kno] knowing01.

- 778 [2] Atlante, S., Mongelli, A., Barbi, V., Martelli, F., Farsetti, A., and Gaetano, C. (2020). The epigenetic implication in  
779 coronavirus infection and therapy. *Clinical Epigenetics*, 12(1):156.
- 780 [3] Bartas, M., Brázda, V., Bohálová, N., Cantara, A., Volná, A., Stachurová, T., Malachová, K., Jagelská, E. B.,  
781 Porubiaková, O., Červeň, J., and Pečinka, P. (2020). In-depth bioinformatic analyses of nidovirales including human  
782 sars-cov-2, sars-cov, mers-cov viruses suggest important roles of non-canonical nucleic acid structures in their  
783 lifecycles. *Frontiers in Microbiology*, 11:1583.
- 784 [4] Bojkova, D., Klann, K., Koch, B., Widera, M., Krause, D., Ciesek, S., Cinatl, J., and Münch, C. (2020). Proteomics  
785 of sars-cov-2-infected host cells reveals therapy targets. *Nature*, 583(7816):469–472.
- 786 [5] Budach, S. and Marsico, A. (2018). Pysster: classification of biological sequences by learning sequence and  
787 structure motifs with convolutional neural networks. *Bioinformatics*, 34(17):3035–3037.
- 788 [6] Burgess, H. M., Depledge, D. P., Thompson, L., Srinivas, K. P., Grande, R. C., Vink, E. I., Abebe, J. S., Blackaby,  
789 W. P., Hendrick, A., Albertella, M. R., et al. (2021). Targeting the m6a rna modification pathway blocks sars-cov-2  
790 and hcov-oc43 replication. *Genes & development*, 35(13-14):1005–1019.
- 791 [7] Carithers, L. J., Ardlie, K., Barcus, M., Branton, P. A., Britton, A., Buia, S. A., Compton, C. C., DeLuca, D. S.,  
792 Peter-Demchok, J., Gelfand, E. T., Guan, P., Korzeniewski, G. E., Lockhart, N. C., Rabiner, C. A., Rao, A. K.,  
793 Robinson, K. L., Roche, N. V., Sawyer, S. J., Segrè, A. V., Shive, C. E., Smith, A. M., Sobin, L. H., Undale, A. H.,  
794 Valentino, K. M., Vaught, J., Young, T. R., and Moore, H. M. a. (2015). A novel approach to high-quality postmortem  
795 tissue procurement: The gtx project. *Biopreservation and Biobanking*, 13(5):311–319. PMID: 26484571.
- 796 [8] Caudron-Herger, M., Jansen, R., Wassmer, E., and Diederichs, S. (2021). Rbp2go: a comprehensive pan-species  
797 database on rna-binding proteins, their interactions and functions. *Nucleic Acids Res*, 49(D1):D425–D436.
- 798 [9] Ciccocanti, F., Di Rienzo, M., Romagnoli, A., Colavita, F., Refolo, G., Castilletti, C., Agrati, C., Brai, A., Manetti,  
799 F., Botta, L., Capobianchi, M., Ippolito, G., Piacentini, M., and Fimia, G. (2021). Proteomic analysis identifies the  
800 rna helicase ddx3x as a host target against sars-cov-2 infection. *Antiviral Res*, 190:105064.
- 801 [10] D’Alessandro, A., Thomas, T., Dzieciatkowska, M., Hill, R. C., Francis, R. O., Hudson, K. E., Zimring, J. C., Hod,  
802 E. A., Spitalnik, S. L., and Hansen, K. C. (2020). Serum proteomics in COVID-19 patients: Altered coagulation and  
803 complement status as a function of IL-6 level. *J. Proteome Res.*, 19(11):4417–4427.
- 804 [11] Davey, N. E., Travé, G., and Gibson, T. J. (2011). How viruses hijack cell regulation. *Trends in biochemical  
805 sciences*, 36(3):159–169.
- 806 [12] Demichev, V., Tober-Lau, P., Lemke, O., Nazarenko, T., Thibeault, C., Whitwell, H., Röhl, A., Freiwald, A.,  
807 Szyrwił, L., Ludwig, D., Correia-Melo, C., Aulakh, S. K., Helbig, E. T., Stubbemann, P., Lippert, L. J., Grüning,  
808 N.-M., Blyuss, O., Vernardis, S., White, M., Messner, C. B., Joannidis, M., Sonnweber, T., Klein, S. J., Pizzini,  
809 A., Wohlfarter, Y., Sahanic, S., Hilbe, R., Schaefer, B., Wagner, S., Mittermaier, M., Machleidt, F., Garcia, C.,  
810 Ruwwe-Glösenkamp, C., Lingscheid, T., Bosquillon de Jarcy, L., Stegemann, M. S., Pfeiffer, M., Jürgens, L.,  
811 Denker, S., Zickler, D., Enghard, P., Zeleznik, A., Campbell, A., Hayward, C., Porteous, D. J., Marioni, R. E.,  
812 Uhrig, A., Müller-Redetzky, H., Zoller, H., Löffler-Ragg, J., Keller, M. A., Tancevski, I., Timms, J. F., Zaikin, A.,  
813 Hippenstiel, S., Ramharter, M., Witzentrath, M., Suttorp, N., Lilley, K., Mülleleder, M., Sander, L. E., PA-COVID-19  
814 Study group, Ralser, M., and Kurth, F. (2021). A time-resolved proteomic and prognostic map of COVID-19. *Cell  
815 Syst.*, 12(8):780–794.e7.
- 816 [13] Di, B., Jia, H., Luo, O. J., Lin, F., Li, K., Zhang, Y., Wang, H., Liang, H., Fan, J., and Yang, Z. (2020). Identification  
817 and validation of predictive factors for progression to severe COVID-19 pneumonia by proteomics. *Signal Transduct.  
818 Target. Ther.*, 5(1):217.
- 819 [14] Dominguez, D., Freese, P., Alexis, M. S., Su, A., Hochman, M., Palden, T., Bazile, C., Lambert, N. J., Van Nos-  
820 trand, E. L., Pratt, G. A., et al. (2018). Sequence, structure, and context preferences of human rna binding proteins.  
821 *Molecular Cell*, 70(5):854–867.
- 822 [15] Farkas, C., Mella, A., Turgeon, M., and Haigh, J. J. (2021). A novel sars-cov-2 viral sequence bioinformatic  
823 pipeline has found genetic evidence that the viral 3 untranslated region (utr) is evolving and generating increased  
824 viral diversity. *Frontiers in microbiology*, 12.

COMPUTATIONAL MAPPING OF THE HUMAN-SARS-CoV-2 PROTEIN-RNA INTERACTOME

- 825 [16] Feng, H., Bao, S., Rahman, M. A., Weyn-Vanhentenryck, S. M., Khan, A., Wong, J., Shah, A., Flynn, E. D.,  
826 Krainer, A. R., and Zhang, C. (2019). Modeling RNA-Binding Protein Specificity In Vivo by Precisely Registering  
827 Protein-RNA Crosslink Sites. *Molecular Cell*, 74(6):1189–1204.e6.
- 828 [17] Fernandes, J. D., Hinrichs, A. S., Clawson, H., Gonzalez, J. N., Lee, B. T., Nassar, L. R., Raney, B. J., Rosenbloom,  
829 K. R., Nerli, S., Rao, A. A., Schmelter, D., Fyfe, A., Maulding, N., Zweig, A. S., Lowe, T. M., Ares, M., Corbet-  
830 Detig, R., Kent, W. J., Haussler, D., and Haussler, M. (2020). The UCSC SARS-CoV-2 Genome Browser. *Nature*  
831 *Genetics*, 52(10):991–998.
- 832 [18] Flynn, R. A., Belk, J. A., Qi, Y., Yasumoto, Y., Wei, J., Alfajaro, M. M., Shi, Q., Mumbach, M. R., Limaye, A.,  
833 DeWeirdt, P. C., et al. (2021). Discovery and functional interrogation of sars-cov-2 rna-host protein interactions.  
834 *Cell*, 184(9):2394–2411.
- 835 [19] Fu, Y., Jia, G., Pang, X., Wang, R. N., Wang, X., Li, C. J., Smemo, S., Dai, Q., Bailey, K. A., Nobrega, M. A., Han,  
836 K.-L., Cui, Q., and He, C. (2013). FTO-mediated formation of N6-hydroxymethyladenosine and N6-formyladenosine  
837 in mammalian RNA. *Nature Communications*, 4(1).
- 838 [20] Fung, T. S. and Liu, D. X. (2019). Human coronavirus: host-pathogen interaction. *Annual review of microbiology*,  
839 73:529–557.
- 840 [21] Garcia-Moreno, M., Järvelin, A. I., and Castello, A. (2018). Unconventional rna-binding proteins step into the  
841 virus–host battlefield. *Wiley Interdisciplinary Reviews: RNA*, 9(6):e1498.
- 842 [22] Geyer, P. E., Arend, F. M., Doll, S., Louiset, M.-L., Virreira Winter, S., Müller-Reif, J. B., Torun, F. M., Weigand,  
843 M., Eichhorn, P., Bruegel, M., Strauss, M. T., Holdt, L. M., Mann, M., and Teupser, D. (2021). High-resolution  
844 serum proteome trajectories in COVID-19 reveal patient-specific seroconversion. *EMBO Mol. Med.*, 13(8):e14167.
- 845 [23] Ghanbari, M. and Ohler, U. (2020). Deep neural networks for interpreting rna-binding protein target preferences.  
846 *Genome Research*, 30(2):214–226.
- 847 [24] Gordon, D. E., Hiatt, J., Bouhaddou, M., Rezelj, V. V., Ulferts, S., et al. (2020a). Comparative host-coronavirus  
848 protein interaction networks reveal pan-viral disease mechanisms. *Science*, 370(6521):eabe9403.
- 849 [25] Gordon, D. E., Jang, G. M., Bouhaddou, M., Xu, J., Obernier, K., White, K. M., O’Meara, M. J., Rezelj, V. V.,  
850 Guo, J. Z., Swaney, D. L., et al. (2020b). A sars-cov-2 protein interaction map reveals targets for drug repurposing.  
851 *Nature*, 583(7816):459–468.
- 852 [26] Hafner, M., Katsantoni, M., Köster, T., Marks, J., Mukherjee, J., Staiger, D., Ule, J., and Zavolan, M. (2021). Clip  
853 and complementary methods. *Nature Reviews Methods Primers*, 1(1):1–23.
- 854 [27] Haimovich, G., Olender, T., Baez, C., and Gerst, J. E. (2020). Identification and enrichment of secrete cis-acting  
855 rna elements in the coronaviridae and other (+) single-strand rna viruses. *bioRxiv*.
- 856 [28] Hallegger, M., Chakrabarti, A., Lee, F., Lee, B., Amaliotti, A., Odeh, H., Copley, K., Rubien, J., Portz, B., Kuret,  
857 K., Huppertz, I., Rau, F., Patani, R., Fawzi, N., Shorter, J., Luscombe, N., and Ule, J. (2021). Tdp-43 condensation  
858 properties specify its rna-binding and regulatory repertoire. *Cell*, 184(18):637–51.
- 859 [29] Hentze, M. W., Castello, A., Schwarzl, T., and Preiss, T. (2018). A brave new world of rna-binding proteins.  
860 *Nature Reviews Molecular Cell Biology*, 19(5):327–341.
- 861 [30] Hoffmann, H.-H., Sánchez-Rivera, F. J., Schneider, W. M., Luna, J. M., Soto-Feliciano, Y. M., Ashbrook, A. W.,  
862 Le Pen, J., Leal, A. A., Ricardo-Lax, I., Michailidis, E., et al. (2021a). Functional interrogation of a sars-cov-2 host  
863 protein interactome identifies unique and shared coronavirus host factors. *Cell Host & Microbe*, 29(2):267–280.
- 864 [31] Hoffmann, M., Arora, P., Groß, R., Seidel, A., Hörnich, B. F., Hahn, A. S., Krüger, N., Graichen, L., Hofmann-  
865 Winkler, H., Kempf, A., Winkler, M. S., Schulz, S., Jäck, H.-M., Jahrsdörfer, B., Schrezenmeier, H., Müller, M.,  
866 Kleger, A., Münch, J., and Pöhlmann, S. (2021b). SARS-CoV-2 variants B.1.351 and P.1 escape from neutralizing  
867 antibodies. *Cell*, 184(9):2384–2393.e12.
- 868 [32] Hou, Y. J., Chiba, S., Halfmann, P., Ehre, C., Kuroda, M., Dinno III, K. H., Leist, S. R., Schäfer, A., Nakajima,  
869 N., Takahashi, K., et al. (2020). Sars-cov-2 d614g variant exhibits efficient replication ex vivo and transmission in  
870 vivo. *Science*, 370(6523):1464–1468.
- 871 [33] Hu, J., Peng, P., Cao, X., Wu, K., Chen, J., Wang, K., Tang, N., and Huang, A.-I. (2022). Increased immune  
872 escape of the new SARS-CoV-2 variant of concern Omicron. *Cellular and Molecular Immunology*, 19(2):293–295.



COMPUTATIONAL MAPPING OF THE HUMAN-SARS-CoV-2 PROTEIN-RNA INTERACTOME

- 873 [34] Ilias, I., Diamantopoulos, A., Botoula, E., Athanasiou, N., Zacharis, A., Tsipilis, S., Jahaj, E., Vassiliou, A.,  
874 Vassiliadi, D., Kotanidou, A., Tsagarakis, S., and Dimopoulou, I. (2021). Covid-19 and growth hormone/insulin-like  
875 growth factor 1: Study in critically and non-critically ill patients. Front Endocrinol, 12:644055.
- 876 [35] Initiative, C.-. H. G. and Ganna, A. (2021). Mapping the human genetic architecture of covid-19: an update.  
877 medRxiv.
- 878 [36] Jangi, M., Boutz, P., Paul, P., and Sharp, P. (2014). Rbfox2 controls autoregulation in rna-binding protein networks.  
879 Genes Dev, 28(6):637–51.
- 880 [37] Kamel, W., Noerenberg, M., Cerikan, B., Chen, H., Järvelin, A., Kammoun, M., Lee, J., Shuai, N., Garcia-Moreno,  
881 M., Andrejeva, A., Deery, M., Johnson, N., Neufeldt, C., Cortese, M., Knight, M., Lilley, K., Martinez, J., Davis,  
882 I., Bartenschlager, R., Mohammed, S., and Castello, A. (2021). Global analysis of protein-rna interactions in  
883 sars-cov-2-infected cells reveals key regulators of infection. Mol Cell, 81(13):2851–2867.
- 884 [38] Keene, J. (2001). Ribonucleoprotein infrastructure regulating the flow of genetic information between the genome  
885 and the proteome. Proc Natl Acad Sci U S A, 98(19):7018–24.
- 886 [39] Kim, D., Lee, J., Yang, J., Kim, J., Kim, V., and Chang, H. (2020). The architecture of sars-cov-2 transcriptome.  
887 Cell, 181(4):914–921.
- 888 [40] Kim, D.-K., Weller, B., Lin, C.-W., Sheykhkarimli, D., Knapp, J. J., Kishore, N., Sauer, M., Rayhan, A., Young,  
889 V., Marin-de la Rosa, N., Pogoutse, O., et al. (2021). A map of binary sars-cov-2 protein interactions implicates host  
890 immune regulation and ubiquitination. bioRxiv.
- 891 [41] Kingma, D. P. and Ba, J. (2014). Adam: A method for stochastic optimization. arXiv preprint arXiv:1412.6980.
- 892 [42] Kuo, P.-H., Chiang, C.-H., Wang, Y.-T., Doudeva, L. G., and Yuan, H. S. (2014). The crystal structure of  
893 tdp-43 rrm1-dna complex reveals the specific recognition for ug- and tg-rich nucleic acids. Nucleic acids research,  
894 42(7):4712–4722.
- 895 [43] Labeau, A., Lefevre-Utile, A., Bonnet-Madin, L., Fery-Simonian, L., Soumelis, V., Lotteau, V., Vidalain, P.-O.,  
896 Amara, A., and Meertens, L. (2021). Characterization and functional interrogation of sars-cov-2 rna interactome.  
897 BioRxiv.
- 898 [44] Lahaye, X., Gentili, M., Silvin, A., Conrad, C., Picard, L., Jouve, M., Zueva, E., Maurin, M., Nadalin, F., Knott,  
899 G., Zhao, B., Du, F., Rio, M., Amiel, J., Fox, A., Li, P., Etienne, L., Bond, C., Colleaux, L., and Manel, N. (2018).  
900 Nono detects the nuclear hiv capsid to promote cgas-mediated innate immune activation. Cell, 175(2):488–501.
- 901 [45] Lambert, N., Robertson, A., Jangi, M., McGeary, S., Sharp, P., and Burge, C. (2014). Rna bind-n-seq: quantitative  
902 assessment of the sequence and structural binding specificity of rna binding proteins. Molecular Cell, 54(5):887–900.
- 903 [46] Lee, S., Lee, Y.-s., Choi, Y., Son, A., Park, Y., Lee, K.-M., Kim, J., Kim, J.-S., and Kim, V. N. (2021). The  
904 sars-cov-2 rna interactome. Molecular Cell.
- 905 [47] Li, Z. and Nagy, P. (2011a). Diverse roles of host rna binding proteins in rna virus replication. RNA Biol,  
906 8(2):305–15.
- 907 [48] Li, Z. and Nagy, P. D. (2011b). Diverse roles of host rna binding proteins in rna virus replication. RNA biology,  
908 8(2):305–315.
- 909 [49] Licata, L., Lo Surdo, P., Iannuccelli, M., Palma, A., Micarelli, E., Perfetto, L., Peluso, D., Calderone, A.,  
910 Castagnoli, L., and Cesareni, G. (2020). Signor 2.0, the signaling network open resource 2.0: 2019 update. Nucleic  
911 Acids Res, 48(D1):D504–D510.
- 912 [50] Liu, H., Wei, P., Kappler, J. W., Marrack, P., and Zhang, G. (2022). SARS-CoV-2 Variants of Concern and Variants  
913 of Interest Receptor Binding Domain Mutations and Virus Infectivity. Frontiers in Immunology, 13:825256.
- 914 [51] Liu, J., Xu, Y.-P., Li, K., Ye, Q., Zhou, H.-Y., Sun, H., Li, X., Yu, L., Deng, Y.-Q., Li, R.-T., Cheng, M.-L., He, B.,  
915 Zhou, J., Li, X.-F., Wu, A., Yi, C., and Qin, C.-F. (2021a). The m6A methylome of SARS-CoV-2 in host cells. Cell  
916 Research, 31(4).
- 917 [52] Liu, Y., Liu, J., Johnson, B. A., Xia, H., Ku, Z., Schindewolf, C., Widen, S. G., An, Z., Weaver, S. C., Menachery,  
918 V. D., Xie, X., and Shi, P.-Y. (2021b). Delta spike P681R mutation enhances SARS-CoV-2 fitness over Alpha variant.  
919 bioRxiv, page 2021.08.12.456173.

COMPUTATIONAL MAPPING OF THE HUMAN-SARS-CoV-2 PROTEIN-RNA INTERACTOME

- 920 [53] Lubinski, B., Frazier, L. E., Phan, M. V. T., Bugembe, D. L., Tang, T., Daniel, S., Cotten, M., Jaimes, J. A.,  
921 and Whittaker, G. R. (2021). Spike protein cleavage-activation mediated by the SARS-CoV-2 P681R mutation: a  
922 case-study from its first appearance in variant of interest (VOI) A.23.1 identified in Uganda. Technical report.
- 923 [54] Luo, H., Chen, Q., Chen, J., Chen, K., Shen, X., and Jiang, H. (2005). The nucleocapsid protein of sars  
924 coronavirus has a high binding affinity to the human cellular heterogeneous nuclear ribonucleoprotein a1. FEBS  
925 letters, 579(12):2623–2628.
- 926 [55] Mahiet, C. and Swanson, C. M. (2016). Control of HIV-1 gene expression by SR proteins. Biochemical Society  
927 Transactions, 44(5):1417–1425.
- 928 [56] Manokaran, G., Finol, E., Wang, C., Gunaratne, J., Bahl, J., Ong, E., Tan, H., Sessions, O., Ward, A., Gubler,  
929 D., Harris, E., Garcia-Blanco, M., and Ooi, E. (2015). Dengue subgenomic rna binds trim25 to inhibit interferon  
930 expression for epidemiological fitness. Science, 9(350):6257.
- 931 [57] Messner, C. B., Demichev, V., Wendisch, D., Michalick, L., White, M., Freiwald, A., Textoris-Taube, K.,  
932 Vernardis, S. I., Egger, A.-S., Kreidl, M., Ludwig, D., Kilian, C., Agostini, F., Zelezniak, A., Thibeault, C., Pfeiffer,  
933 M., Hippenstiel, S., Hocke, A., von Kalle, C., Campbell, A., Hayward, C., Porteous, D. J., Marioni, R. E., Langenberg,  
934 C., Lilley, K. S., Kuebler, W. M., Mülleider, M., Drosten, C., Suttorp, N., Witzenth, M., Kurth, F., Sander, L. E.,  
935 and Ralsler, M. (2020). Ultra-high-throughput clinical proteomics reveals classifiers of COVID-19 infection. Cell  
936 Syst., 11(1):11–24.e4.
- 937 [58] Meyer, K. D., Saletore, Y., Zumbo, P., Elemento, O., Mason, C. E., and Jaffrey, S. R. (2012). Comprehensive  
938 analysis of mrna methylation reveals enrichment in 3 utrs and near stop codons. Cell, 149(7):1635–1646.
- 939 [59] Molleston, J. M. and Cherry, S. (2017). Attacked from all sides: Rna decay in antiviral defense. Viruses, 9(1):2.
- 940 [60] Mukherjee, M. and Goswami, S. (2020). Global cataloguing of variations in untranslated regions of viral genome  
941 and prediction of key host rna binding protein-microrna interactions modulating genome stability in sars-cov-2. PLoS  
942 one, 15(8):e0237559.
- 943 [61] Mukherjee, N., Wessels, H., Lebedeva, S., Sajek, M., Ghanbari, M., Garzia, A., Munteanu, A., Yusuf, D., Farazi,  
944 T., Hoell, J., Akat, K., Akalin, A., Tuschl, and Ohler, U. (2019). Deciphering human ribonucleoprotein regulatory  
945 networks. Nucleic Acids Res, 47(2):570–581.
- 946 [62] Nabeel-Shah, S., Lee, H., Ahmed, N., Burke, G., Farhangmehr, S., Ashraf, K., Pu, S., Braunschweig, U., Zhong,  
947 G., Wei, H., Tang, H., Yang, J., Marcon, E., Blencowe, B., Zhang, Z., and Greenblatt, J. (2022). Sars-cov-2  
948 nucleocapsid protein binds host mRNAs and attenuates stress granules to impair host stress response. iScience,  
949 25(1):103562.
- 950 [63] Overmyer, K., Shishkova, E., Miller, I., Balnis, J., Bernstein, M., Peters-Clarke, T., Meyer, J., Quan, Q.,  
951 Muehlbauer, L., Trujillo, E., and He, Y. e. a. (2021). Large-scale multi-omic analysis of covid-19 severity. Cell Syst,  
952 12(1):23–40.
- 953 [64] Pairo-Castineira, E., Clohisey, S., Klaric, L., Bretherick, A. D., Rawlik, K., Pasko, D., Walker, S., Parkinson, N.,  
954 Fourman, M. H., Russell, C. D., Furniss, J., Richmond, A., Gountouna, E., Wrobel, N., Harrison, D., Wang, B.,  
955 Wu, Y., Meynert, A., Griffiths, F., Oosthuyzen, W., Kousathanas, A., Moutsianas, L., Yang, Z., Zhai, R., Zheng,  
956 C., Grimes, G., Beale, R., Millar, J., Shih, B., Keating, S., Zechner, M., Haley, C., Porteous, D. J., Hayward, C.,  
957 Yang, J., Knight, J., Summers, C., Shankar-Hari, M., Klenerman, P., Turtle, L., Ho, A., Moore, S. C., Hinds, C.,  
958 Horby, P., Nichol, A., Maslove, D., Ling, L., McAuley, D., Montgomery, H., Walsh, T., Pereira, A. C., Renieri, A.,  
959 GenOMICC Investigators, ISARIC4C Investigators, COVID-19 Human Genetics Initiative, 23andMe Investigators,  
960 BRACOVIC Investigators, Gen-COVID Investigators, Shen, X., Ponting, C. P., Fawkes, A., Tenesa, A., Caulfield,  
961 M., Scott, R., Rowan, K., Murphy, L., Openshaw, P. J. M., Semple, M. G., Law, A., Vitart, V., Wilson, J. F., and  
962 Baillie, J. K. (2021). Genetic mechanisms of critical illness in COVID-19. Nature, 591(7848):92–98.
- 963 [65] Pennemann, F., Mussabekova, A., Urban, C., Stukalov, A., Andersen, L., Grass, V., Lavacca, T., Holze, C.,  
964 Oubraham, L., Benamrouche, Y., Girardi, E., Boulos, R., Hartmann, R., Superti-Furga, G., Habjan, M., Imler, J.,  
965 Meignin, C., and Pichlmair, A. (2021). Cross-species analysis of viral nucleic acid interacting proteins identifies  
966 taoks as innate immune regulators. Nat Commun, 12(1):7009.
- 967 [66] Rothamel, K., Arcos, S., Kim, B., Reasoner, C., Lisy, S., Mukherjee, N., and Ascano, M. (2021). Elavl1 primarily  
968 couples mrna stability with the 3' utrs of interferon-stimulated genes. Cell Rep, 35(8):109178.

COMPUTATIONAL MAPPING OF THE HUMAN-SARS-CoV-2 PROTEIN-RNA INTERACTOME

- 969 [67] Sanyaolu, A., Okorie, C., Marinkovic, A., Haider, N., Abbasi, A. F., Jaferi, U., Prakash, S., and Balendra, V. (2021).  
970 The emerging sars-cov-2 variants of concern. Therapeutic advances in infectious disease, 8:20499361211024372.
- 971 [68] Sayers, E. W., Beck, J., Bolton, E. E., Bourexis, D., Brister, J. R., Canese, K., Comeau, D. C., Funk, K., Kim, S.,  
972 Klimke, W., et al. (2021). Database resources of the national center for biotechnology information. Nucleic acids  
973 research, 49(D1):D10.
- 974 [69] Schmidt, N., Lareau, C. A., Keshishian, H., Ganskih, S., Schneider, C., Hennig, T., Melanson, R., Werner, S., Wei,  
975 Y., Zimmer, M., et al. (2021). The sars-cov-2 rna-protein interactome in infected human cells. Nature Microbiology,  
976 6(3):339–353.
- 977 [70] Schneider, W. M., Luna, J. M., Hoffmann, H.-H., Sánchez-Rivera, F. J., Leal, A. A., Ashbrook, A. W., Le Pen,  
978 J., Ricardo-Lax, I., Michailidis, E., Peace, A., Stenzel, A. F., Lowe, S. W., MacDonald, M. R., Rice, C. M., and  
979 Poirier, J. T. (2021). Genome-scale identification of sars-cov-2 and pan-coronavirus host factor networks. Cell,  
980 184(1):120–132.e14.
- 981 [71] Shen, B., Yi, X., Sun, Y., Bi, X., Du, J., Zhang, C., Quan, S., Zhang, F., Sun, R., Qian, L., Ge, W., Liu, W., Liang,  
982 S., Chen, H., Zhang, Y., Li, J., Xu, J., He, Z., Chen, B., Wang, J., Yan, H., Zheng, Y., Wang, D., Zhu, J., Kong, Z.,  
983 Kang, Z., Liang, X., Ding, X., Ruan, G., Xiang, N., Cai, X., Gao, H., Li, L., Li, S., Xiao, Q., Lu, T., Zhu, Y., Liu,  
984 H., Chen, H., and Guo, T. (2020). Proteomic and metabolomic characterization of COVID-19 patient sera. Cell,  
985 182(1):59–72.e15.
- 986 [72] Sievers, F. and Higgins, D. G. (2014). Clustal omega, accurate alignment of very large numbers of sequences. In  
987 Multiple sequence alignment methods, pages 105–116. Springer.
- 988 [73] Sola, I., Almazán, F., Zúñiga, S., and Enjuanes, L. (2015). Continuous and discontinuous rna synthesis in  
989 coronaviruses. Annu Rev Virol, 1(3):265–88.
- 990 [74] Soto-Acosta, R., Xie, X., Shan, C., Baker, C. K., Shi, P.-Y., Rossi, S. L., Garcia-Blanco, M. A., and Bradrick,  
991 S. (2018). Fragile x mental retardation protein is a zika virus restriction factor that is antagonized by subgenomic  
992 flaviviral rna. Elife, 7:e39023.
- 993 [75] Srivastava, N., Hinton, G., Krizhevsky, A., Sutskever, I., and Salakhutdinov, R. (2014). Dropout: a simple way to  
994 prevent neural networks from overfitting. The journal of machine learning research, 15(1):1929–1958.
- 995 [76] Srivastava, R., Daulatabad, S. V., Srivastava, M., and Janga, S. C. (2020). Role of SARS-CoV-2 in altering  
996 the RNA binding protein and miRNA directed post-transcriptional regulatory networks in humans. bioRxiv, page  
997 2020.07.06.190348.
- 998 [77] Stelzer, G., Rosen, N., Plaschkes, I., Zimmermann, S., Twik, M., Fishilevich, S., Stein, T. I., Nudel, R., Lieder, I.,  
999 Mazor, Y., et al. (2016). The genecards suite: from gene data mining to disease genome sequence analyses. Current  
1000 protocols in bioinformatics, 54(1):1–30.
- 1001 [78] Stukalov, A., Girault, V., Grass, V., Karayel, O., Bergant, V., Urban, C., Haas, D. A., Huang, Y., Oubraham, L.,  
1002 Wang, A., Hamad, M. S., et al. (2021). Multilevel proteomics reveals host perturbations by sars-cov-2 and sars-cov.  
1003 Nature, 594(7862):246–252.
- 1004 [79] Sugimoto, Y., König, J., Hussain, S., Zupan, B., Curk, T., Frye, M., and Ule, J. (2012). Analysis of clip and iclip  
1005 methods for nucleotide-resolution studies of protein-rna interactions. Genome biology, 13(8):1–13.
- 1006 [80] Sun, L., Li, P., Ju, X., Rao, J., Huang, W., Ren, L., Zhang, S., Xiong, T., Xu, K., Zhou, X., Gong, M., Miska,  
1007 E., Ding, Q., Wang, J., and Zhang, Q. C. (2021). In vivo structural characterization of the sars-cov-2 rna genome  
1008 identifies host proteins vulnerable to repurposed drugs. Cell, 184(7):1865–1883.e20.
- 1009 [81] Sundararajan, M., Taly, A., and Yan, Q. (2017). Axiomatic attribution for deep networks. In International  
1010 Conference on Machine Learning, pages 3319–3328. PMLR.
- 1011 [82] Teplova, M., Hafner, M., Teplov, D., Essig, K., Tuschl, T., and Patel, D. (2013). Structure-function studies of star  
1012 family quaking proteins bound to their in vivo rna target sites. Genes Dev, 27(8):928–40.
- 1013 [83] Tirumuru, N., Zhao, B., Lu, W., Lu, Z., C, H., and Wu, L. (2016). N(6)-methyladenosine of hiv-1 rna regulates  
1014 viral infection and hiv-1 gag protein expression. Elife, 5:e15528.
- 1015 [84] Ulrich, L., Halwe, N. J., Taddeo, A., Ebert, N., Schön, J., Devisme, C., Trüeb, B. S., Hoffmann, B., Wider, M., Fan,  
1016 X., et al. (2022). Enhanced fitness of sars-cov-2 variant of concern alpha but not beta. Nature, 602(7896):307–313.

COMPUTATIONAL MAPPING OF THE HUMAN-SARS-CoV-2 PROTEIN-RNA INTERACTOME

- 1017 [85] Van Nostrand, E., Freese, P., Pratt, G., Wang, X., Wei, X., Xiao, R., Blue, S., Chen, J., Cody, N., and Dominguez,  
1018 D. (2020a). A large-scale binding and functional map of human rna-binding proteins. Nature, 583(7818):711–719.
- 1019 [86] Van Nostrand, E. L., Freese, P., Pratt, G. A., Wang, X., Wei, X., Xiao, R., Blue, S. M., Chen, J.-Y., Cody, N. A.,  
1020 Dominguez, D., et al. (2020b). A large-scale binding and functional map of human rna-binding proteins. Nature,  
1021 583(7818):711–719.
- 1022 [87] Vandelli, A., Monti, M., Milanetti, E., Armaos, A., Rupert, J., Zacco, E., Bechara, E., Delli Ponti, R., and Tartaglia,  
1023 G. G. (2020). Structural analysis of sars-cov-2 genome and predictions of the human interactome. Nucleic Acids  
1024 Research, 48(20):11270–11283.
- 1025 [88] Vashist, S., Urena, L., Chaudhry, Y., and Goodfellow, I. (2012). Identification of rna-protein interaction networks  
1026 involved in the norovirus life cycle. J Virol, 86(22):11977–90.
- 1027 [89] Verma, R., Saha, S., Kumar, S., Mani, S., Maiti, T. K., and Surjit, M. (2021). RNA-protein interaction analysis of  
1028 SARS-CoV-2 5' and 3' untranslated regions reveals a role of lysosome-associated membrane protein-2a during viral  
1029 infection. mSystems, 6(4):e0064321.
- 1030 [90] V'kovski, P., Kratzel, A., Steiner, S., Stalder, H., and Thiel, V. (2021). Coronavirus biology and replication:  
1031 implications for sars-cov-2. Nature Reviews Microbiology, 19(3):155–170.
- 1032 [91] Wang, R., Simoneau, C. R., Kulsuptrakul, J., Bouhaddou, M., Travisano, K. A., Hayashi, J. M., Carlson-Stevermer,  
1033 J., Zengel, J. R., Richards, C. M., Fozouni, P., Oki, J., Rodriguez, L., Joehnk, B., Walcott, K., Holden, K., Sil,  
1034 A., Carette, J. E., Krogan, N. J., Ott, M., and Puschnik, A. S. (2021). Genetic screens identify host factors for  
1035 SARS-CoV-2 and common cold coronaviruses. Cell, 184(1):106–119.e14.
- 1036 [92] Wei, J., Alfajaro, M. M., DeWeirdt, P. C., Hanna, R. E., Lu-Culligan, W. J., Cai, W. L., Strine, M. S., Zhang,  
1037 S.-M., Graziano, V. R., Schmitz, C. O., et al. (2021). Genome-wide crispr screens reveal host factors critical for  
1038 sars-cov-2 infection. Cell, 184(1):76–91.e13.
- 1039 [93] Wheeler, E. C., Van Nostrand, E. L., and Yeo, G. W. (2018). Advances and challenges in the detection of  
1040 transcriptome-wide protein–rna interactions. Wiley Interdisciplinary Reviews: RNA, 9(1):e1436.
- 1041 [94] Wu, C.-H., Chen, P.-J., and Yeh, S.-H. (2014). Nucleocapsid phosphorylation and rna helicase ddx1 recruitment  
1042 enables coronavirus transition from discontinuous to continuous transcription. Cell host & microbe, 16(4):462–472.
- 1043 [95] Wu, P., Chen, D., Ding, W., Wu, P., Hou, H., Bai, Y., Zhou, Y., Li, K., Xiang, S., Liu, P., Ju, J., Guo, E., Liu, J.,  
1044 Yang, B., Fan, J., He, L., Sun, Z., Feng, L., Wang, J., Wu, T., Wang, H., Cheng, J., Xing, H., Meng, Y., Li, Y., Zhang,  
1045 Y., Luo, H., Xie, G., Lan, X., Tao, Y., Li, J., Yuan, H., Huang, K., Sun, W., Qian, X., Li, Z., Huang, M., Ding, P.,  
1046 Wang, H., Qiu, J., Wang, F., Wang, S., Zhu, J., Ding, X., Chai, C., Liang, L., Wang, X., Luo, L., Sun, Y., Yang, Y.,  
1047 Zhuang, Z., Li, T., Tian, L., Zhang, S., Zhu, L., Chang, A., Chen, L., Wu, Y., Ma, X., Chen, F., Ren, Y., Xu, X.,  
1048 Liu, S., Wang, J., Yang, H., Wang, L., Sun, C., Ma, D., Jin, X., and Chen, G. (2021). The trans-omics landscape of  
1049 COVID-19. Nat. Commun., 12(1):4543.
- 1050 [96] Xiang, J. S., Mueller, J. R., Luo, E.-C., Yee, B., Schafer, D., Schmok, J. C., Tan, F. E., Her, H.-L., Chen, C.-Y.,  
1051 Brannan, K. W., Jones, K. L., Park, S. S., Jin, W., McVicar, R., Kwong, E. M., Le, P., Kofman, E., Vu, A. Q., Li,  
1052 Y., Tankka, A. T., Dong, K. D., Song, Y., Carlin, A. F., Van Nostrand, E. L., Leibel, S. L., and Yeo, G. W. (2021).  
1053 Discovery and Functional Interrogation of the Virus and Host RNA Interactome of SARS-Cov-2 Proteins. SSRN  
1054 Scholarly Paper 3867726, Social Science Research Network, Rochester, NY.
- 1055 [97] Zannella, C., Rinaldi, L., Boccia, G., Chianese, A., Sasso, F. C., De Caro, F., Franci, G., and Galdiero, M. (2021).  
1056 Regulation of m6a methylation as a new therapeutic option against covid-19. Pharmaceuticals, 14(11):1135.
- 1057 [98] Zhang, J., Xiao, T., Cai, Y., Lavine, C. L., Peng, H., Zhu, H., Anand, K., Tong, P., Gautam, A., Mayer, M. L.,  
1058 Walsh, R. M., Rits-Volloch, S., Wesemann, D. R., Yang, W., Seaman, M. S., Lu, J., and Chen, B. (2021). Membrane  
1059 fusion and immune evasion by the spike protein of SARS-CoV-2 Delta variant. Technical report.
- 1060 [99] Zhang, X., Hao, H., Ma, L., Zhang, Y., Hu, X., Chen, Z., Liu, D., Yuan, J., Hu, Z., and Guan, W. (2020).  
1061 Methyltransferase-like 3 modulates severe acute respiratory syndrome coronavirus-2 rna n6-methyladenosine  
1062 modification and replication. bioRxiv.

## COMPUTATIONAL MAPPING OF THE HUMAN-SARS-CoV-2 PROTEIN-RNA INTERACTOME

### 1063 **Code and Data Availability**

1064 Training data and pre-trained models, together with scripts for training and prediction are available at <https://github.com/mhorlacher/sc2rbpmap>. RBP binding sites on the SARS-CoV-2 genome and variant impact scores for 11 viral  
1065 strains are available at <https://sc2rbpmap.helmholtz-munich.de>.  
1066



## COMPUTATIONAL MAPPING OF THE HUMAN-SARS-CoV-2 PROTEIN-RNA INTERACTOME

### 1067 **Acknowledgments**

1068 This work was supported by the Helmholtz Association under the joint research school "Munich School for Data  
1069 Science - MUDS to M.H., S.O., G.C., P.S. and A.M., the Deutsche Forschungsgemeinschaft (SFB/TR501 84 TP C01)  
1070 to A.M. and L.M., the Helmholtz Association AeroHEALTH grant to A.M. and Y.H., and the German Ministry for  
1071 Education and Research as BIFOLD - Berlin Institute for the Foundations of Learning and Data (01IS18037A) to M.G.  
1072 and U.O. This work is also supported by the Joachim Herz Foundation for Y.H.

## COMPUTATIONAL MAPPING OF THE HUMAN-SARS-CoV-2 PROTEIN-RNA INTERACTOME

### 1073 **Author Contributions**

1074 **Marc Horlacher:** Conceptualization; Data pre-processing and curation; Machine learning model training and pre-  
1075 diction; comparative genomics analysis; viral strains analysis; Interpretation of results; Visualisation; Methodology;  
1076 Implementation of the Dashboard; Writing – original draft; Writing – review & editing. **Svitlana Oleshko:** Conceptual-  
1077 ization; Data curation; RBP map clustering and visualisation; SECRete motif and viral strains analysis; Interpretation  
1078 of results; Writing – review & editing. **Yue Hu:** Conceptualization; Data curation; model predictions; downstream  
1079 statistical analysis; viral strains analysis; Interpretation of results; Methodology; Writing – review & editing. **Mahsa**  
1080 **Ghanbari:** Analysis of PARCLIP data and machine learning model training; Writing – review & editing. **Giulia**  
1081 **Cantini:** Implementation of the Dashboard. **Patrick Schinke:** Implementation of the Dashboard. **Ernesto Elorduy**  
1082 **Vergara:** Conceptualization; Methodology. **Florian Bittner:** Software engineering for public data integration and  
1083 analysis. **Nikola S. Mueller:** Conceptualization; Supervision; Public data curation and analysis; Visualisation; Writing  
1084 – original draft; Writing – review & editing. **Uwe Ohler:** Conceptualization; Supervision; Funding acquisition and  
1085 resources. **Lamber Moyon:** Conceptualization; Supervision; Viral strain analysis; Interpretation of the results; Visuali-  
1086 sation; Methodology; Writing – original draft; Writing – review & editing. **Annalisa Marsico:** Conceptualization;  
1087 Supervision; Methodology; Visualisation; Interpretation of the results; Funding acquisition and resources; Writing –  
1088 original draft; Writing – review & editing.

COMPUTATIONAL MAPPING OF THE HUMAN-SARS-COV-2 PROTEIN-RNA INTERACTOME

1089 **Conflict of Interest Statement**

1090 Authors F.B. and N.S.M. hold positions at knowing01 GmbH that might benefit or be at a disadvantage from the  
1091 published findings. The remaining authors declare no conflict of interest that is relevant to the content of this article.

COMPUTATIONAL MAPPING OF THE HUMAN-SARS-CoV-2 PROTEIN-RNA INTERACTOME

1092 **6 Tables**

Table 1: Subset of high delta score mutations passing binding sites thresholds

|    | RBP    | Variant   | Strain                  | Genomic element | REF score | ALT score | delta score | Impact |
|----|--------|-----------|-------------------------|-----------------|-----------|-----------|-------------|--------|
| 0  | SRSF7  | G210T     | delta, kappa            | 5' UTR          | 0.768     | 0.457     | -0.311      | loss   |
| 1  | RBM20  | C3267T    | alpha                   | ORF1ab          | 0.813     | 0.336     | -0.477      | loss   |
| 2  | RBM22  | C18877T   | mu                      | ORF1ab          | 0.338     | 0.614     | 0.276       | gain   |
| 3  | HNRNPC | C21575T   | iota                    | S               | 0.374     | 0.840     | 0.467       | gain   |
| 4  | MBNL1  | del_22281 | beta                    | S               | 0.800     | 0.006     | -0.795      | loss   |
| 5  | ELAVL1 | del_22299 | lambda                  | S               | 0.070     | 0.632     | 0.562       | gain   |
| 6  | SF3B4  | del_22299 | lambda                  | S               | 0.871     | 0.128     | -0.744      | loss   |
| 7  | SF3A3  | del_22299 | lambda                  | S               | 0.860     | 0.273     | -0.587      | loss   |
| 8  | U2AF2  | del_22299 | lambda                  | S               | 0.543     | 0.980     | 0.438       | gain   |
| 9  | GPKOW  | del_22299 | lambda                  | S               | 0.297     | 0.841     | 0.544       | gain   |
| 10 | MBNL1  | del_22299 | lambda                  | S               | 0.803     | 0.398     | -0.405      | loss   |
| 11 | SF3A3  | C22995A   | omicron                 | S               | 0.081     | 0.808     | 0.726       | gain   |
| 12 | ORF1   | A23013C   | omicron                 | S               | 0.014     | 0.621     | 0.608       | gain   |
| 13 | ORF1   | A23040G   | omicron                 | S               | 0.006     | 0.673     | 0.666       | gain   |
| 14 | ORF1   | G23048A   | omicron                 | S               | 0.006     | 0.606     | 0.600       | gain   |
| 15 | SND1   | G23048A   | omicron                 | S               | 0.187     | 0.791     | 0.604       | gain   |
| 16 | SRSF7  | C23604A   | alpha, mu               | S               | 0.394     | 0.719     | 0.326       | gain   |
| 17 | SRSF7  | C23604G   | delta, kappa            | S               | 0.394     | 0.792     | 0.398       | gain   |
| 18 | HNRNPC | C25469T   | delta, kappa            | ORF3a           | 0.317     | 0.670     | 0.352       | gain   |
| 19 | FTO    | G25563T   | beta, epsilon, iota, mu | ORF3a           | 0.633     | 0.080     | -0.552      | loss   |
| 20 | FTO    | del_28278 | eta                     | N               | 0.335     | 0.683     | 0.348       | gain   |
| 21 | FTO    | G28280C   | alpha                   | N               | 0.679     | 0.209     | -0.470      | loss   |
| 22 | ORF1   | A28699G   | eta                     | N               | 0.597     | 0.141     | -0.456      | loss   |

## COMPUTATIONAL MAPPING OF THE HUMAN-SARS-COV-2 PROTEIN-RNA INTERACTOME

### 1093 **7 Figures**



COMPUTATIONAL MAPPING OF THE HUMAN-SARS-CoV-2 PROTEIN-RNA INTERACTOME

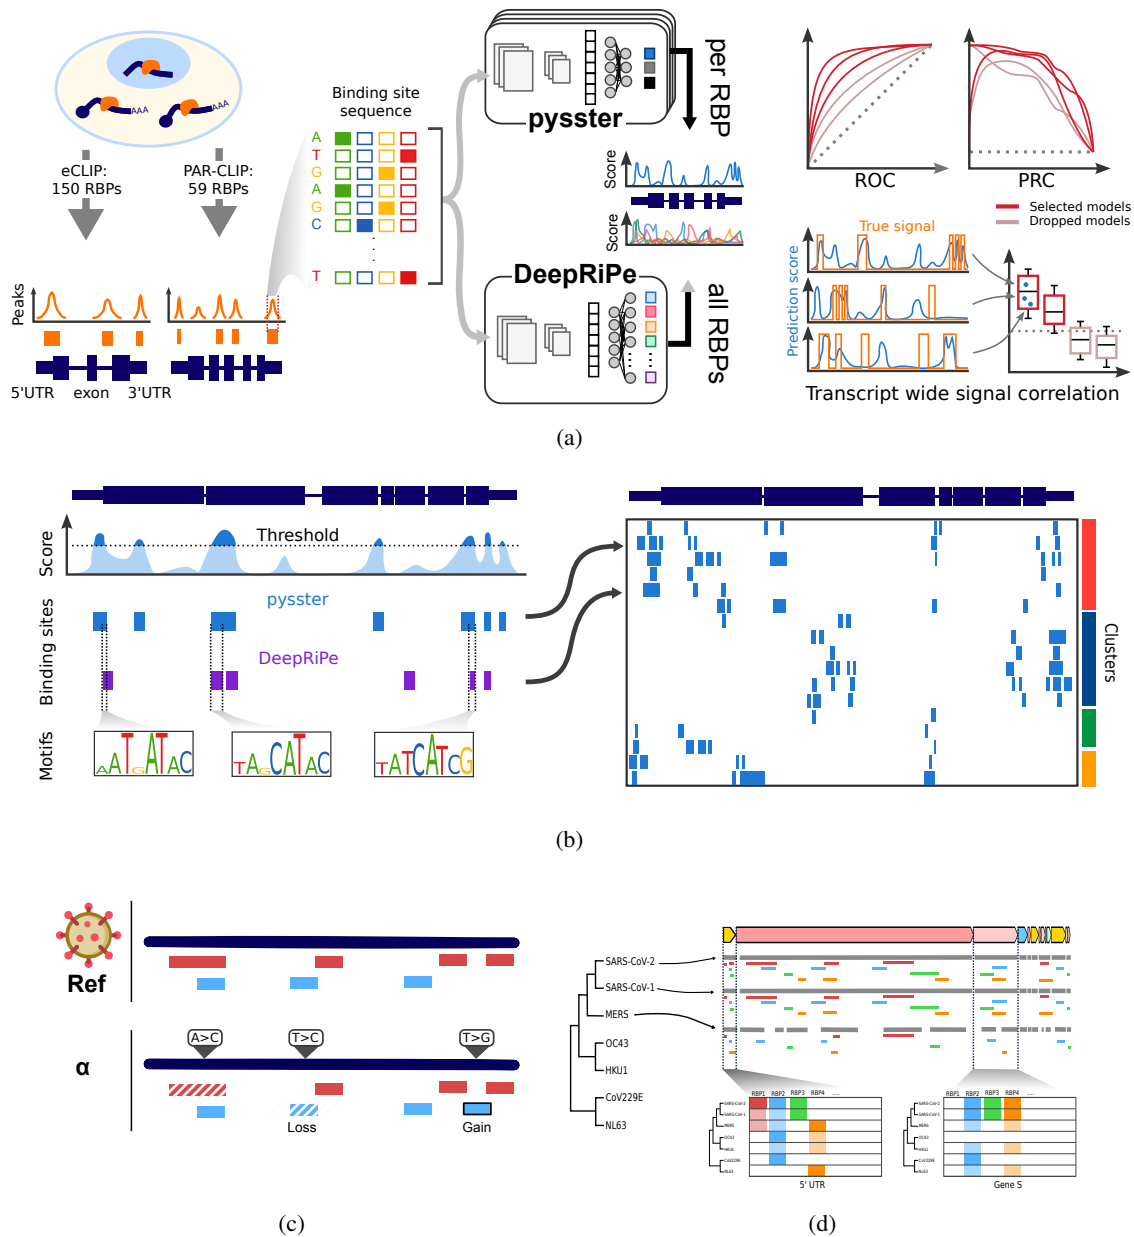

Figure 1: Pipeline of the computational mapping of the human - SARS-CoV-2 protein-RNA interactome. **a.** (Left panel) Interactions between RNA-binding proteins (RBPs) and transcripts can be experimentally measured through eCLIP and PAR-CLIP protocols, enabling the quantification of locally accumulated reads, and the calling of peaks. Such peaks were obtained for 150 RBPs from eCLIP data (86), and for 59 RBPs from PAR-CLIP data (61). (Middle panel) Sequences from these peaks were used to train two deep learning models, composed of convolutional neural networks enabling the detection of complex sequence motifs. These models can then be applied to predict for a given sequence its potential for binding by a RBP. The *pysster* models are trained separately for each RBP, while *DeepRiPe* is trained in a multi-task fashion and simultaneously for all input RBPs. (Right panel) A selection of high-performance models was established through evaluation of performance of the models, from overall performance metrics to in-practice, sequence-wide evaluation. **b.** All retained models were applied to scan the entire genome of SARS-CoV-2, and binding sites were predicted from consecutive, high-prediction scores positions. Sequence motifs underlying RBP binding sites were also identified by interrogating both CNNs via Integrated Gradients. Predictions were compiled in the first *in silico* map of host-protein - viral RNA interactome for SARS-CoV-2. **c** The prediction models were applied to evaluate the impact of variants of concerns, **d** as well as to evaluate the evolutionary trajectory of affinity of host RBPs to other coronaviruses' genomes.

COMPUTATIONAL MAPPING OF THE HUMAN-SARS-CoV-2 PROTEIN-RNA INTERACTOME

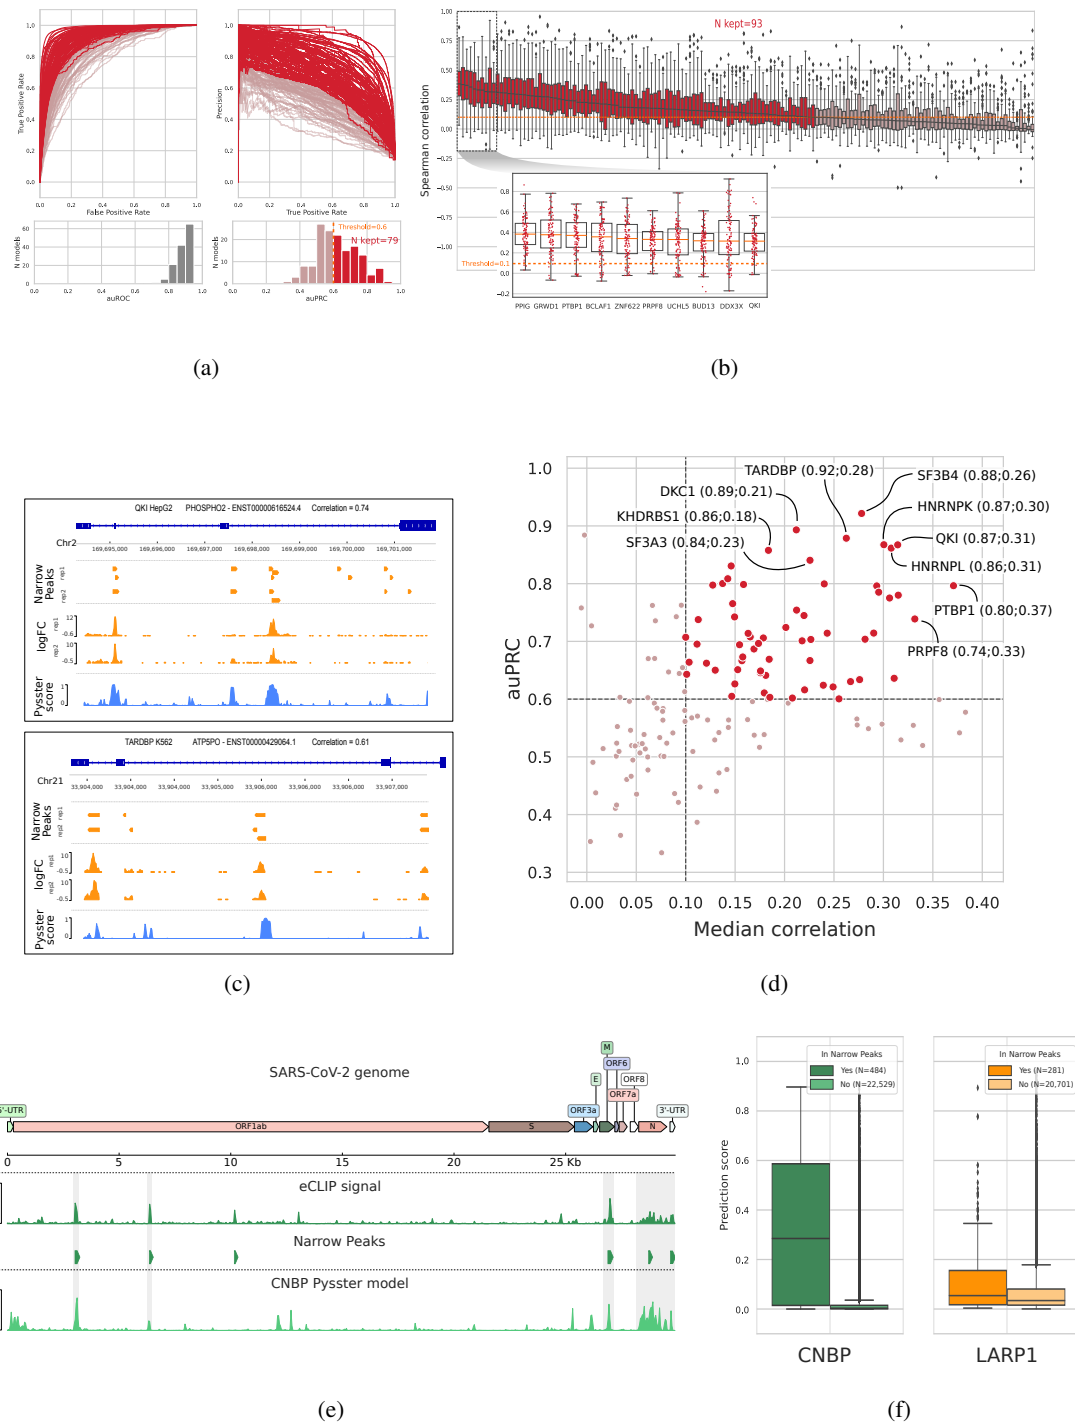

Figure 2: Evaluation of pysster models' performance and high-quality model selection. **a.** Receiver Operating Curve (ROC) and Precision Recall Curve (PRC) for all 150 pysster models trained from ENCODE eCLIP datasets. A first threshold of 0.6 was set on the area under the PRCs (auPRC), leading to a subset of 79 models passing the threshold. **b.** Boxplots of correlations between eCLIP and prediction scores from 100 left-out transcripts per RBP model. This correlation highlights the performance of models in a realistic context of full-sequence-length scan. A second threshold was thus set on the median correlation coefficient, leading to a subset of 93 models passing the threshold. The 10 models with highest median correlation are displayed in a detailed sub-plot. **c.** Genome-browser view illustrating the comparison between eCLIP signals and model prediction scores over full-length transcripts. Two of the best models are presented, with signal from left-out transcripts with high correlation between eCLIP log-fold-change signals and prediction scores from the pysster models. **d.** Scatterplot of the AUPRC and median correlation values for each model, highlighting the final subset of high-quality models. The top 10 models are labeled. **e.** Comparison of genome-wide eCLIP signal and pysster prediction scores from the CNBP eCLIP datasets generated over the SARS-CoV-2 genome by (69). **f.** Boxplot of pysster prediction scores from position within or without overlap from called narrow peaks, for the CNBP model and the LARP1 model.

COMPUTATIONAL MAPPING OF THE HUMAN-SARS-CoV-2 PROTEIN-RNA INTERACTOME

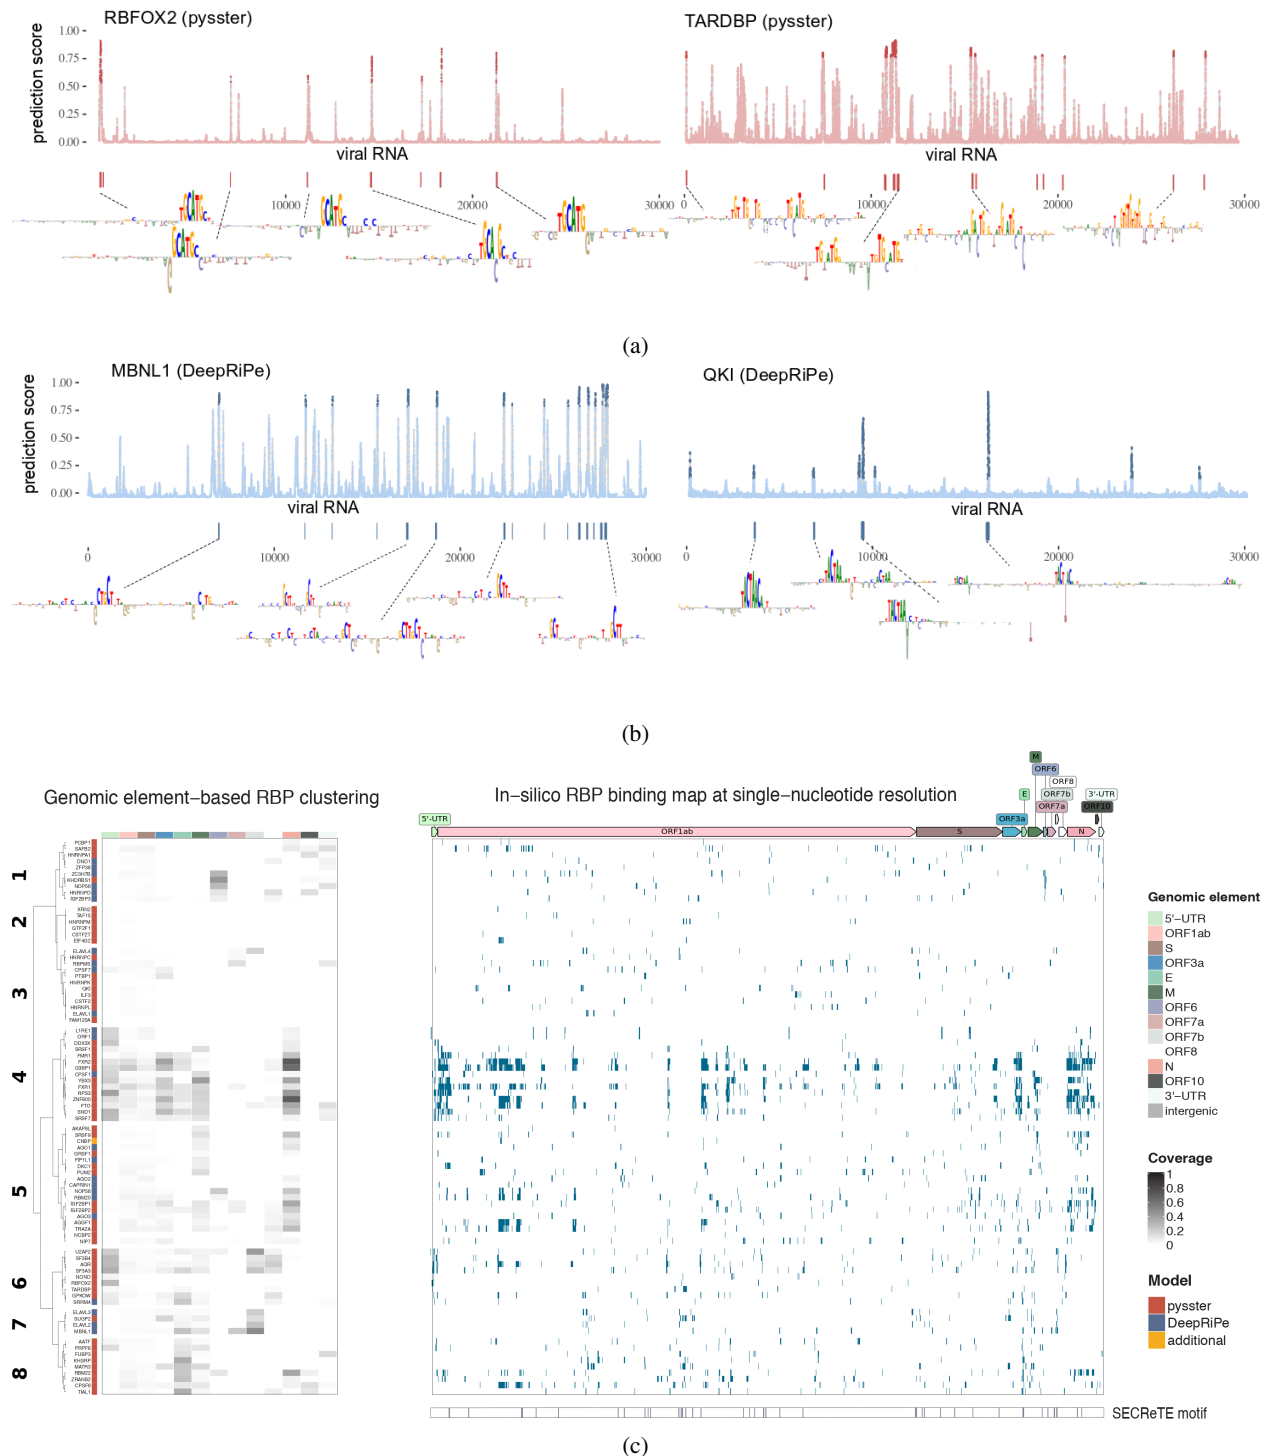

Figure 3: Computational map of RBP binding on SARS-CoV-2. **a** Single-nucleotide probability score for RBFOX2 (left) and TARDBP (right) RBP binding as computed by the corresponding pysster models across the whole SARS-CoV-2 genome. The higher the score, the higher the likelihood of a binding event at that position. Points highlighted in strong color correspond to significant predictions, i.e. with bound probability significantly higher than random (empirical  $p$ -value  $< 0.01$ , see Methods). Wider binding sites, encompassing more than one significant position are shown as vertical bars underneath each prediction profile, together with their corresponding binding motifs as extracted by means of attribution maps (see Methods). **b** Single-nucleotide probability score for MBNL1 (left) and QKI (right) RBP binding as computed by the corresponding DeepRiPe models. Significant positions (empirical  $p$ -value  $< 0.01$ ) are highlighted in strong color, and computed binding sites together with their corresponding motifs are shown underneath. **c** Clustering of RBPs based on binding site coverage of genomic annotations of SARS-CoV-2 for both pysster and DeepRiPe RBPs (left panel). *In silico* RBP binding map, at single-nucleotide resolution, for both pysster and DeepRiPe RBPs (right panel). SARS-CoV-2 SECRETE motifs from (27) are shown below.

COMPUTATIONAL MAPPING OF THE HUMAN-SARS-CoV-2 PROTEIN-RNA INTERACTOME

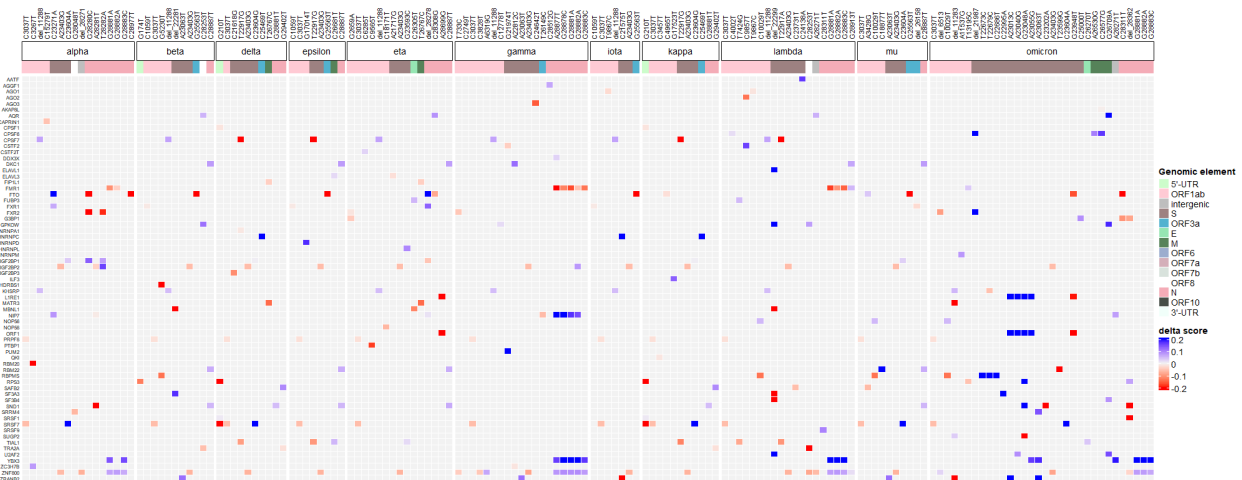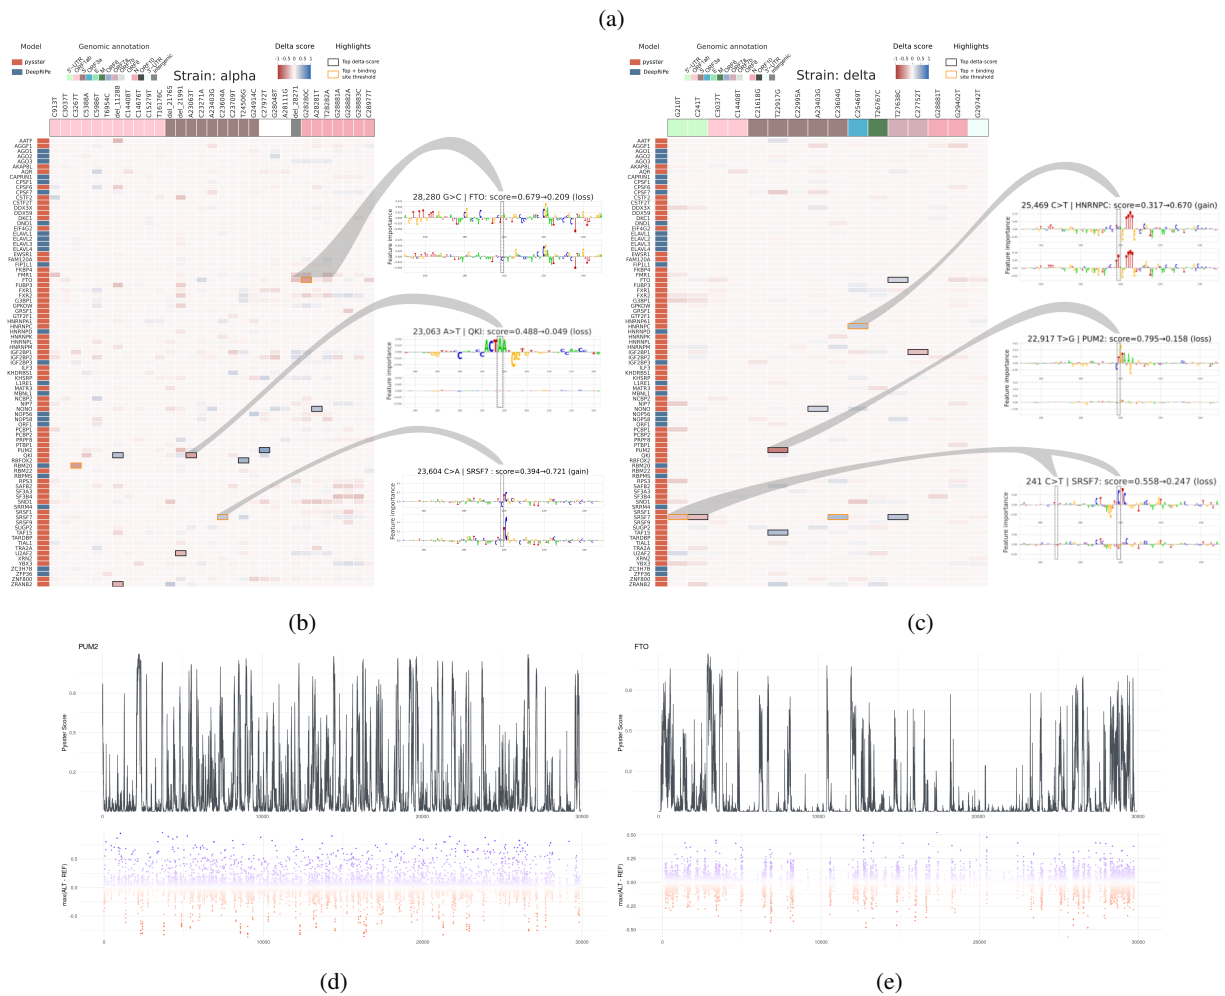

Figure 4: Impact of variants from SARS-CoV-2 strains on predicted binding sites. **a.** Joint heatmap of delta scores from the 290 identified variants in the different SARS-CoV-2 strains. Delta-scores represent the difference in prediction score of a prediction model between alternative and reference sequences centered on each variant. Only the 315 impacts labeled as change-of-binding are colored (see 3.11). Delta score color scale is capped so as to show low delta score impacts. RBPs and mutations without any such impact across strains are dropped from the heatmap. **b.** Complete heatmap of delta scores from 31 variants associated to the alpha viral variant. The top 10 with highest absolute delta scores are lined out, with yellow color indicating the ones labeled as change-of-binding. Some sites are further investigated through integrated gradients, comparing the sequence motifs identified by the prediction models against known motifs from mCrossBase (16). **c.** Complete heatmap of delta scores from 16 variants associated to the delta viral variant. **d,e.** Results from the *in silico* mutagenesis over the SARS-CoV-2 genome. Nucleotides across the viral genome were perturbed towards the three alternative bases, generating a reference distribution of possible delta-scores, notably highlighting positions with highest impacts. Here, **d**) and **e**) display the position-wise reference score (top) and delta score (bottom) for PUM2 and FTO, respectively.

## COMPUTATIONAL MAPPING OF THE HUMAN-SARS-CoV-2 PROTEIN-RNA INTERACTOME

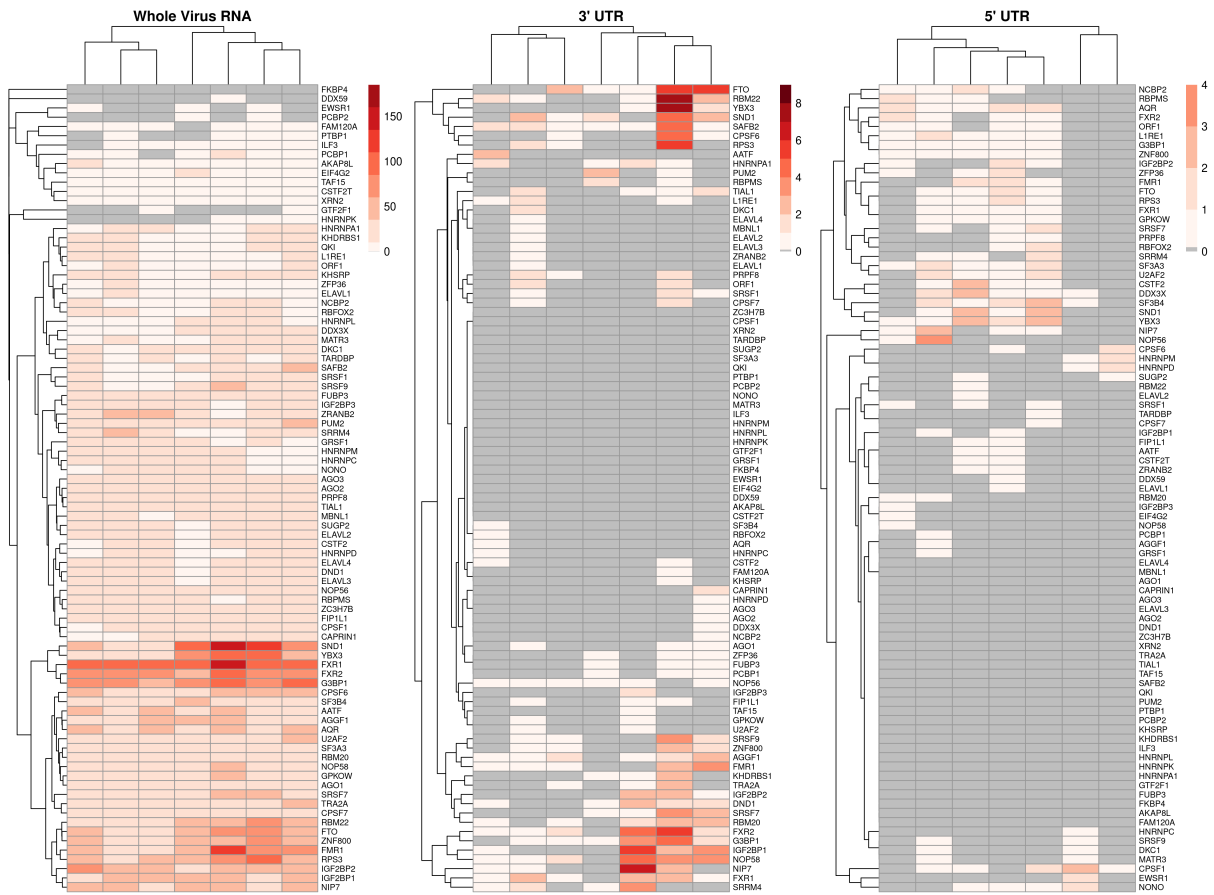

(a)

(b)

(c)

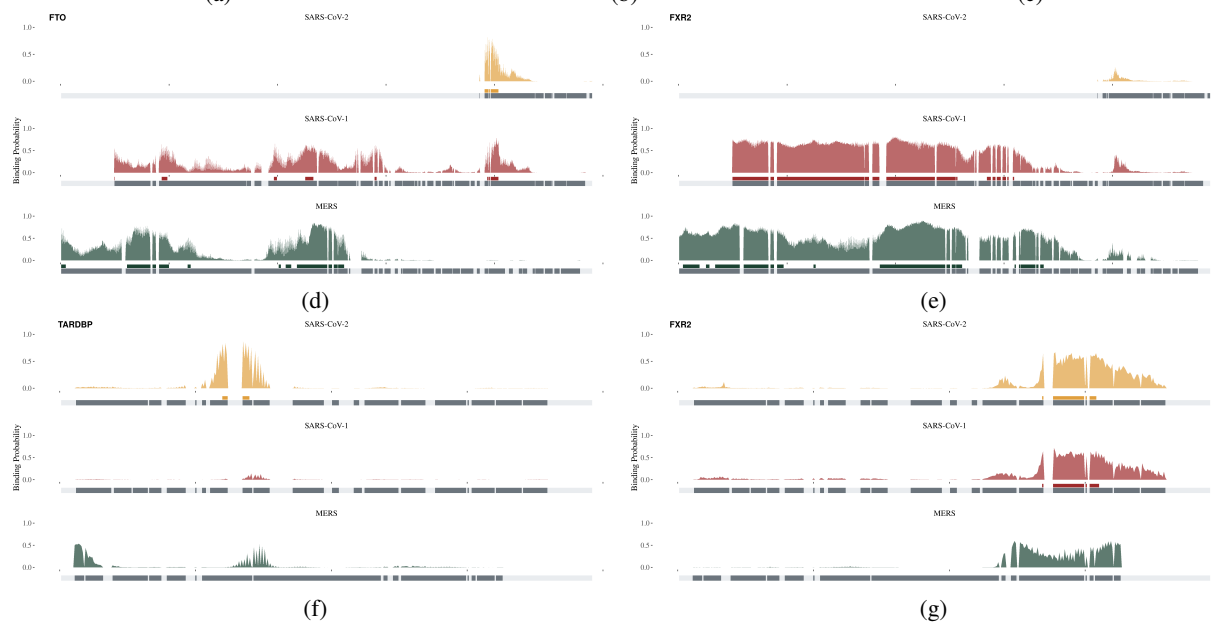

(d)

(e)

(f)

(g)



## COMPUTATIONAL MAPPING OF THE HUMAN-SARS-CoV-2 PROTEIN-RNA INTERACTOME

Figure 5: Comparison of SARS-CoV-2 and 6 other human coronaviruses. **a,b,c.** Binding sites were predicted over the seven human coronaviruses, and their number counted over the entire genome (**a**) or over the 3' (**b**) and 5' (**c**) UTRs. Hierarchical clustering was applied to evaluate the proximity between viruses in terms of binding sites composition. **d,e,f,g.** Examples of evolutionary conserved, gained, and lost binding sites between the three high-severity viruses MERS, SARS-CoV-1, and SARS-CoV2. Panel **d** shows an example for FTO binding sites found only in SARS-Cov-2 and SARS-CoV-1 in their 3' UTRs. Panel **e** shows a binding site for FXR2 only shared between MERS and SARS-CoV-1 in their 3' UTR. Panel **f** shows a binding site for TARDBP exclusive to SARS-CoV-2 in the 5' UTR. Panel **g** shows a binding site for FXR2 only shared between SARS-CoV-2 and SARS-CoV-1 in the 5' UTR.

COMPUTATIONAL MAPPING OF THE HUMAN-SARS-CoV-2 PROTEIN-RNA INTERACTOME

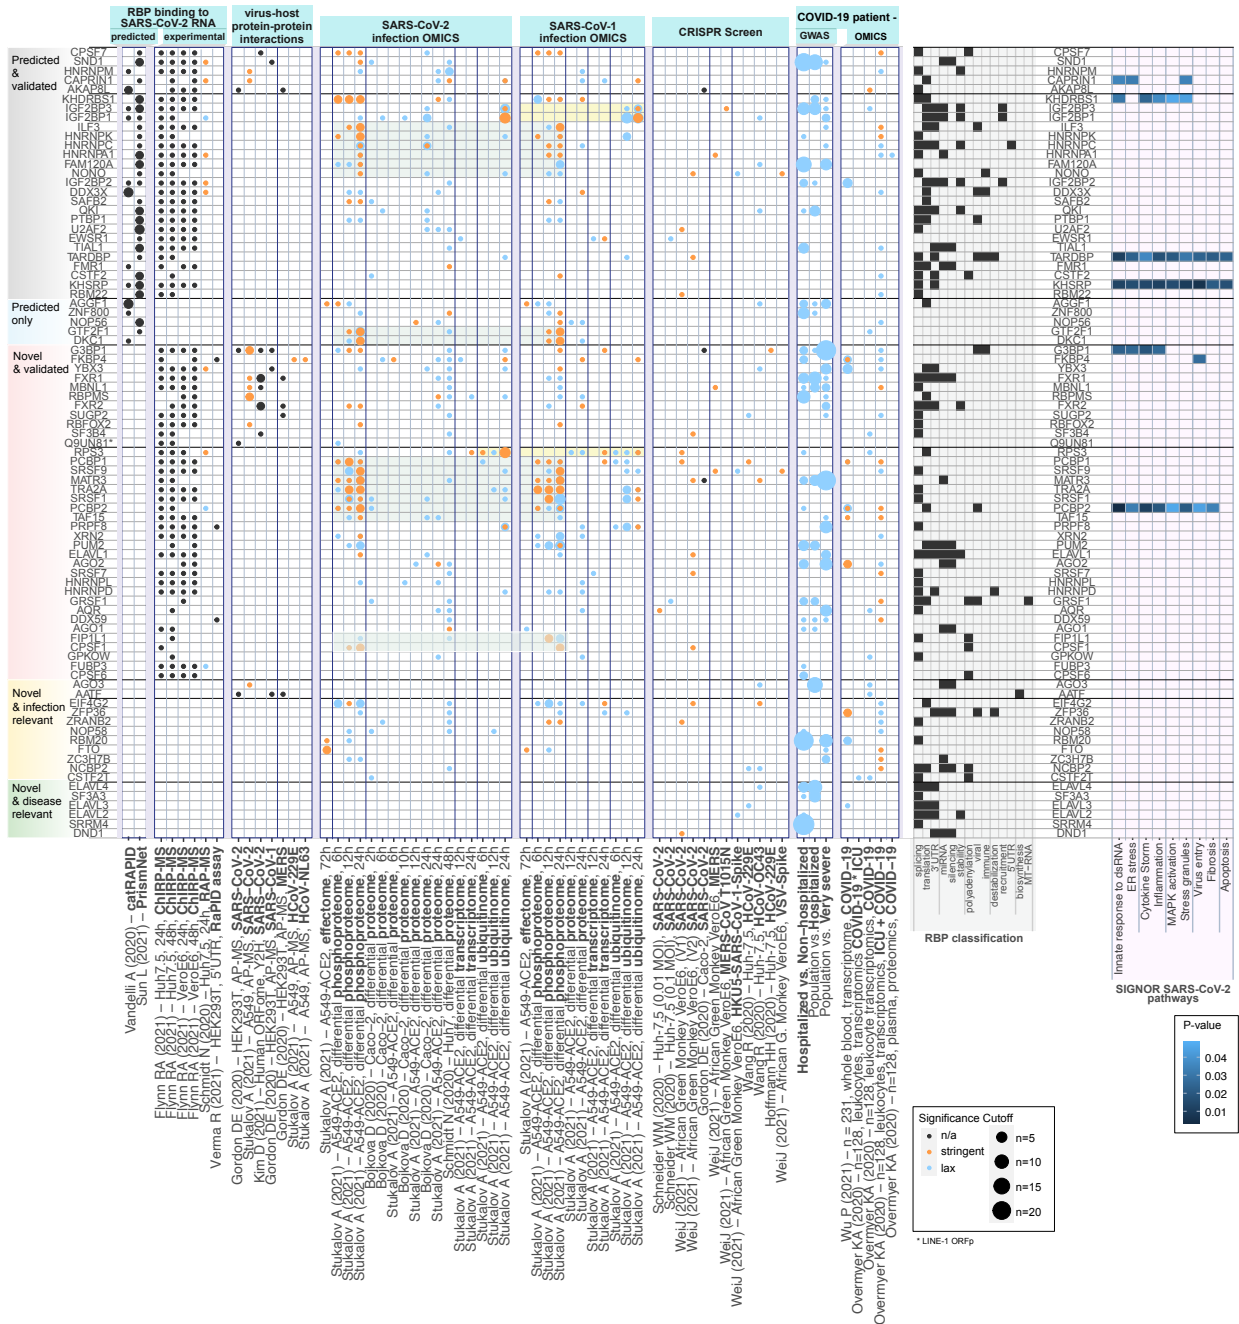

Figure 6: **RBPs in context of public *in vitro* and patient OMICS data.** RBP with model predictions (rows) annotated with experimental evidences found in 92 multiOMIC publicly available research results (columns) followed by information from RBP classification and role in known SARS-CoV-2 pathways. From left to right: RBPs were manually assigned to five categories according to their annotation pattern. RBPs predicted to bind SARS-CoV-2 RNA by the other prediction methods catRAPID, PrismNET. RBPs binding to SARS-CoV-2 RNA determined experimentally by ChIRP-MS, RAP-MS and RAPID assay. Evidences of RBPs with stringent or lax significance cutoffs found in further 55 data sets across multiple OMICS levels and experiment types were grouped by experimental context: Experimental viral-host protein interactions measured by AP-MS across various coronaviruses, SARS-CoV-2 and SARS-CoV-2 infection OMIC (timecourses), selected CRISPR studies, most recent GWAS data (release 6) by Host Genetics Initiative and blood-based patient OMICS data. Light green and yellow boxed highlight few patterns shared between SARS-CoV-2 and -1 infections. Classification of RBP according to their roles related to biological processes. Far right: Annotation of RBPs to pathways related to SARS-CoV-2 infections obtained from SIGNOR database.

COMPUTATIONAL MAPPING OF THE HUMAN-SARS-CoV-2 PROTEIN-RNA INTERACTOME

1094 **8 Supplementary Tables**

Supplementary Table 1: Comparison of high quality pysster and DeepRiPe models

| RBP     | cor of pred score | cor of p-value | # common binding sites |
|---------|-------------------|----------------|------------------------|
| TARDBP  | 0.640832          | 0.40309        | 6                      |
| CSTF2   | 0.459011          | 0.21621        | 6                      |
| IGF2BP1 | 0.387823          | 0.39983        | 9                      |
| PUM2    | 0.383309          | 0.35263        | 10                     |
| CSTF2T  | 0.331395          | 0.22239        | 3                      |
| QKI     | 0.279760          | 0.14371        | 5                      |
| IGF2BP2 | 0.171838          | 0.21092        | 7                      |
| IGF2BP3 | 0.073798          | 0.05951        | 5                      |
| CPSF6   | 0.153344          | 0.26078        | 2                      |
| FXR1    | 0.012354          | 0.14136        | 8                      |
| FXR2    | 0.080191          | 0.19433        | 5                      |
| EWSR1   | 0.009787          | 0.06610        | 0                      |

Supplementary Table 2: Overlap of pysster and DeepRiPe binding sites with SECRETE motif

| RBP    | # overlaps | # binding sites | Ratio | Model    | Binding sites                                                                                                      |
|--------|------------|-----------------|-------|----------|--------------------------------------------------------------------------------------------------------------------|
| FUBP3  | 7          | 20              | 0.350 | pysster  | [11040,11049], [11068,11118], [14155,14165], [14383,14391], [21920,21928], [26299,26317], [26336,26344]            |
| PTBP1  | 1          | 3               | 0.333 | pysster  | [9500,9584]                                                                                                        |
| KHSRP  | 5          | 16              | 0.312 | pysster  | [8596,8635], [9496,9530], [11287,11326], [14142,14172], [26293,26351]                                              |
| SUGP2  | 7          | 24              | 0.292 | pysster  | [9622,9652], [11091,11116], [11191,11231], [11278,11368], [11626,11663], [21580,21596], [27831,27848]              |
| ELAVL4 | 4          | 14              | 0.286 | DeepRiPe | [8622,8624], [11028,11065], [27677,27685], [27802,27824]                                                           |
| ZFP36  | 2          | 7               | 0.286 | DeepRiPe | [8595,8613], [21928,21932]                                                                                         |
| ELAVL2 | 5          | 18              | 0.278 | DeepRiPe | [8612,8624], [11029,11067], [21563,21565], [21911,21942], [27795,27827]                                            |
| ELAVL3 | 4          | 15              | 0.267 | DeepRiPe | [9523,9527], [11041,11065], [21920,21933], [27800,27826]                                                           |
| MBNL1  | 5          | 19              | 0.263 | DeepRiPe | [11645,11657], [15492,15524], [26288,26341], [27164,27199], [27792,27853]                                          |
| MATR3  | 4          | 16              | 0.250 | pysster  | [9511,9539], [11182,11313], [11614,11658], [26303,26324]                                                           |
| AGO2   | 4          | 18              | 0.222 | DeepRiPe | [8589,8631], [15528,15582], [24091,24134], [28722,28730]                                                           |
| NCBP2  | 2          | 9               | 0.222 | pysster  | [12026,12027], [14770,14772]                                                                                       |
| ZNF800 | 8          | 39              | 0.205 | pysster  | [1659,1701], [3826,4059], [12025,12234], [14769,14774], [14800,14882], [15529,15533], [28692,28764], [28911,28957] |
| CSTF2  | 2          | 10              | 0.200 | pysster  | [8591,8633], [13883,13912]                                                                                         |
| QKI    | 3          | 15              | 0.200 | pysster  | [9521,9533], [11326,11347], [14167,14178]                                                                          |

COMPUTATIONAL MAPPING OF THE HUMAN-SARS-CoV-2 PROTEIN-RNA INTERACTOME

|        |    |     |       |          |                                                                                                                                                                          |
|--------|----|-----|-------|----------|--------------------------------------------------------------------------------------------------------------------------------------------------------------------------|
| DDX3X  | 3  | 17  | 0.176 | pysster  | [12026,12030], [14769,14772], [28861,28949]                                                                                                                              |
| TARDBP | 2  | 12  | 0.167 | pysster  | [11117,11123], [11218,11388]                                                                                                                                             |
| G3BP1  | 12 | 83  | 0.145 | pysster  | [818,841], [1651,1731], [3787,4196], [8168,8346], [12026,12376], [14396,14397], [14769,14824], [14836,14908], [15519,15531], [16524,16810], [28386,28753], [28913,28974] |
| GRSF1  | 1  | 7   | 0.143 | pysster  | [28891,28903]                                                                                                                                                            |
| HNRNPC | 2  | 14  | 0.143 | pysster  | [9787,9789], [11034,11044]                                                                                                                                               |
| CPSF6  | 6  | 45  | 0.133 | pysster  | [1707,1715], [3808,4054], [4090,4098], [11182,11214], [21938,21969], [26333,26352]                                                                                       |
| FIP1L1 | 2  | 15  | 0.133 | DeepRiPe | [13900,13935], [21935,21971]                                                                                                                                             |
| SF3B4  | 4  | 30  | 0.133 | pysster  | [11959,12000], [16553,16561], [21527,21529], [24083,24101]                                                                                                               |
| U2AF2  | 4  | 31  | 0.129 | pysster  | [9773,9777], [12004,12023], [14379,14392], [27785,27839]                                                                                                                 |
| DKC1   | 2  | 16  | 0.125 | pysster  | [779,889], [14769,14801]                                                                                                                                                 |
| NONO   | 1  | 8   | 0.125 | pysster  | [11204,11222]                                                                                                                                                            |
| NIP7   | 5  | 43  | 0.116 | pysster  | [806,834], [13880,13945], [14763,14797], [16536,16546], [25236,25254]                                                                                                    |
| CPSF1  | 3  | 28  | 0.107 | DeepRiPe | [827,841], [23278,23312], [28914,28946]                                                                                                                                  |
| GPKOW  | 3  | 28  | 0.107 | pysster  | [11982,12026], [21575,21579], [26302,26310]                                                                                                                              |
| SRSF9  | 3  | 28  | 0.107 | pysster  | [821,834], [12026,12028], [28850,28915]                                                                                                                                  |
| FXR1   | 11 | 106 | 0.104 | pysster  | [639,928], [1631,1703], [1715,1723], [3963,4107], [8619,8627], [13907,13913], [14771,14876], [15506,15549], [16543,16555], [23231,23266], [27401,27417]                  |
| AKAP8L | 1  | 10  | 0.100 | pysster  | [14786,14788]                                                                                                                                                            |
| AATF   | 2  | 22  | 0.091 | pysster  | [5698,5702], [15525,15568]                                                                                                                                               |
| ZRANB2 | 3  | 34  | 0.088 | pysster  | [11655,11661], [21574,21586], [26284,26330]                                                                                                                              |
| AGGF1  | 3  | 35  | 0.086 | pysster  | [4031,4057], [12024,12088], [14766,14776]                                                                                                                                |
| FMR1   | 5  | 59  | 0.085 | pysster  | [750,839], [858,910], [14879,14891], [23268,23276], [28859,28908]                                                                                                        |
| HNRNPD | 1  | 12  | 0.083 | DeepRiPe | [9492,9522]                                                                                                                                                              |
| HNRNPM | 1  | 12  | 0.083 | pysster  | [11345,11384]                                                                                                                                                            |
| NOP56  | 1  | 12  | 0.083 | DeepRiPe | [814,821]                                                                                                                                                                |
| SRSF7  | 3  | 38  | 0.079 | pysster  | [820,838], [14771,14811], [23253,23280]                                                                                                                                  |
| CPSF7  | 2  | 27  | 0.074 | DeepRiPe | [14849,14875], [21924,21929]                                                                                                                                             |
| FXR2   | 5  | 70  | 0.071 | pysster  | [3776,4047], [4059,4063], [12024,12268], [13905,13957], [14770,14775]                                                                                                    |
| ORF1   | 1  | 14  | 0.071 | DeepRiPe | [28693,28703]                                                                                                                                                            |
| FTO    | 4  | 58  | 0.069 | pysster  | [12021,12131], [14795,14809], [23258,23266], [28679,28778]                                                                                                               |
| RBM22  | 3  | 45  | 0.067 | pysster  | [4029,4057], [26286,26336], [28834,28935]                                                                                                                                |



COMPUTATIONAL MAPPING OF THE HUMAN-SARS-CoV-2 PROTEIN-RNA INTERACTOME

|         |   |    |       |          |                                                        |
|---------|---|----|-------|----------|--------------------------------------------------------|
| YBX3    | 4 | 60 | 0.067 | pysster  | [705,870], [14767,14855], [14891,14919], [23295,23327] |
| SF3A3   | 2 | 34 | 0.059 | pysster  | [11965,12009], [16529,16601]                           |
| SRRM4   | 1 | 17 | 0.059 | DeepRiPe | [26278,26328]                                          |
| PRPF8   | 1 | 19 | 0.053 | pysster  | [27150,27193]                                          |
| RPS3    | 3 | 57 | 0.053 | pysster  | [730,941], [14769,14776], [28568,28740]                |
| AGO3    | 1 | 20 | 0.050 | DeepRiPe | [28710,28752]                                          |
| SND1    | 4 | 82 | 0.049 | pysster  | [750,852], [14771,14772], [23266,23287], [28697,28720] |
| AGO1    | 1 | 22 | 0.045 | DeepRiPe | [28712,28771]                                          |
| SAFB2   | 2 | 44 | 0.045 | pysster  | [1688,1710], [4042,4062]                               |
| SRSF1   | 1 | 22 | 0.045 | pysster  | [12024,12028]                                          |
| TRA2A   | 2 | 47 | 0.043 | pysster  | [12025,12055], [14766,14774]                           |
| TIAL1   | 1 | 27 | 0.037 | pysster  | [26271,26318]                                          |
| PUM2    | 1 | 29 | 0.034 | pysster  | [27141,27165]                                          |
| AQR     | 1 | 30 | 0.033 | pysster  | [11957,12027]                                          |
| RBM20   | 1 | 30 | 0.033 | DeepRiPe | [28728,28736]                                          |
| IGF2BP1 | 1 | 50 | 0.020 | pysster  | [28657,28722]                                          |
| CAPRIN1 | 0 | 19 | 0.000 | DeepRiPe |                                                        |
| CSTF2T  | 0 | 3  | 0.000 | pysster  |                                                        |
| DDX59   | 0 | 0  | 0.000 | pysster  |                                                        |
| DND1    | 0 | 14 | 0.000 | DeepRiPe |                                                        |
| EIF4G2  | 0 | 5  | 0.000 | pysster  |                                                        |
| ELAVL1  | 0 | 7  | 0.000 | DeepRiPe |                                                        |
| EWSR1   | 0 | 0  | 0.000 | pysster  |                                                        |
| FAM120A | 0 | 2  | 0.000 | pysster  |                                                        |
| FKBP4   | 0 | 0  | 0.000 | pysster  |                                                        |
| GTF2F1  | 0 | 1  | 0.000 | pysster  |                                                        |
| HNRNPA1 | 0 | 16 | 0.000 | pysster  |                                                        |
| HNRNPK  | 0 | 1  | 0.000 | pysster  |                                                        |
| HNRNPL  | 0 | 9  | 0.000 | pysster  |                                                        |
| IGF2BP2 | 0 | 50 | 0.000 | pysster  |                                                        |
| IGF2BP3 | 0 | 23 | 0.000 | DeepRiPe |                                                        |
| ILF3    | 0 | 9  | 0.000 | pysster  |                                                        |
| KHDRBS1 | 0 | 10 | 0.000 | pysster  |                                                        |
| L1RE1   | 0 | 13 | 0.000 | DeepRiPe |                                                        |
| NOP58   | 0 | 26 | 0.000 | DeepRiPe |                                                        |
| PCBP1   | 0 | 8  | 0.000 | pysster  |                                                        |
| PCBP2   | 0 | 0  | 0.000 | pysster  |                                                        |
| RBFOX2  | 0 | 8  | 0.000 | pysster  |                                                        |
| RBPMS   | 0 | 19 | 0.000 | DeepRiPe |                                                        |

COMPUTATIONAL MAPPING OF THE HUMAN-SARS-CoV-2 PROTEIN-RNA INTERACTOME

|        |   |    |       |          |
|--------|---|----|-------|----------|
| TAF15  | 0 | 5  | 0.000 | pysster  |
| XRN2   | 0 | 2  | 0.000 | pysster  |
| ZC3H7B | 0 | 20 | 0.000 | DeepRiPe |

Supplementary Table 3: Overlap of pysster and DeepRiPe models with proteins from external sources

| RBP     | pysster |       |        | DeepRiPe |      | Overlaps with proteins from external sources |      |                |                  |      |      |                 |                 |                     |                   |                   | SIGNOR*                                                           |
|---------|---------|-------|--------|----------|------|----------------------------------------------|------|----------------|------------------|------|------|-----------------|-----------------|---------------------|-------------------|-------------------|-------------------------------------------------------------------|
|         | auROC   | auPRC | medPIP | auROC    | AP   | (40)                                         | (24) | (92)           | (70)             | (69) | (18) | (87)            | (4)             | (46)                | (78)              | (80)              |                                                                   |
| AATF    | 0.92    | 0.66  | 0.1    |          |      |                                              | X    |                |                  |      |      |                 |                 |                     |                   |                   |                                                                   |
| AGGF1   | 0.91    | 0.71  | 0.17   |          |      |                                              |      |                |                  |      | X    |                 |                 | X <sup>15</sup>     |                   |                   |                                                                   |
| AGO1    |         |       |        | 0.79     | 0.32 |                                              |      |                | X <sup>4</sup>   |      |      |                 |                 |                     |                   |                   |                                                                   |
| AGO2    |         |       |        | 0.85     | 0.5  |                                              |      |                |                  |      |      |                 |                 |                     |                   |                   |                                                                   |
| AGO3    |         |       |        | 0.87     | 0.49 |                                              |      |                |                  |      |      |                 |                 |                     |                   |                   |                                                                   |
| AKAP8L  | 0.89    | 0.6   | 0.21   |          |      | X                                            |      |                |                  |      | X    |                 |                 |                     |                   |                   |                                                                   |
| AQR     | 0.93    | 0.7   | 0.22   |          |      |                                              |      | X              |                  |      |      |                 |                 |                     |                   |                   |                                                                   |
| CAPRIN1 |         |       |        | 0.76     | 0.22 |                                              |      |                | X <sup>234</sup> |      |      |                 |                 | X <sup>1416</sup>   |                   | X <sup>18</sup>   | Innate response to dsRNA, ER stress, Stress granules              |
| CPSF1   |         |       |        | 0.77     | 0.23 |                                              | X    |                |                  |      |      |                 |                 | X <sup>1516</sup>   |                   |                   |                                                                   |
| CPSF6   | 0.89    | 0.61  | 0.18   | 0.79     | 0.26 |                                              |      |                |                  |      |      |                 |                 |                     |                   |                   |                                                                   |
| CPSF7   |         |       |        | 0.79     | 0.54 |                                              |      |                |                  |      |      | X <sup>6</sup>  |                 | X <sup>1516</sup>   |                   | X <sup>18</sup>   |                                                                   |
| CSTF2   | 0.93    | 0.81  | 0.14   | 0.82     | 0.3  |                                              |      |                |                  |      |      |                 |                 |                     |                   | X <sup>1718</sup> |                                                                   |
| CSTF2T  | 0.92    | 0.6   | 0.19   | 0.84     | 0.66 |                                              |      |                |                  |      |      |                 |                 |                     |                   |                   |                                                                   |
| DDX3X   | 0.96    | 0.78  | 0.32   |          |      |                                              |      |                | X <sup>23</sup>  |      | X    |                 | X <sup>10</sup> | X <sup>15</sup>     |                   |                   |                                                                   |
| DDX59   | 0.89    | 0.67  | 0.16   |          |      |                                              |      |                | X <sup>4</sup>   |      |      |                 |                 |                     |                   |                   |                                                                   |
| DKC1    | 0.96    | 0.89  | 0.21   |          |      |                                              |      |                |                  |      | X    |                 |                 | X <sup>1516</sup>   |                   |                   |                                                                   |
| DND1    |         |       |        | 0.82     | 0.46 |                                              |      |                |                  |      |      |                 |                 |                     |                   |                   |                                                                   |
| EIF4G2  | 0.95    | 0.78  | 0.31   |          |      |                                              |      | X              | X <sup>4</sup>   |      |      |                 |                 | X <sup>1516</sup>   |                   |                   |                                                                   |
| ELAVL1  |         |       |        | 0.9      | 0.73 |                                              |      | X              |                  | X    |      | X <sup>67</sup> | X <sup>8</sup>  | X <sup>1516</sup>   |                   |                   |                                                                   |
| ELAVL2  |         |       |        | 0.93     | 0.61 |                                              |      |                |                  |      |      |                 |                 |                     |                   |                   |                                                                   |
| ELAVL3  |         |       |        | 0.94     | 0.72 |                                              |      |                |                  |      |      |                 |                 |                     |                   |                   |                                                                   |
| ELAVL4  |         |       |        | 0.93     | 0.58 |                                              |      |                |                  |      |      |                 |                 |                     |                   |                   |                                                                   |
| EWSR1   | 0.93    | 0.62  | 0.22   | 0.85     | 0.2  |                                              |      | X <sup>1</sup> |                  |      |      |                 | X <sup>9</sup>  | X <sup>1216</sup>   |                   | X <sup>18</sup>   |                                                                   |
| FAM120A | 0.92    | 0.62  | 0.24   |          |      |                                              |      |                |                  | X    |      |                 | X <sup>8</sup>  | X <sup>1516</sup>   |                   | X <sup>1718</sup> |                                                                   |
| FIP1L1  |         |       |        | 0.8      | 0.3  |                                              |      |                | X <sup>4</sup>   |      |      |                 |                 | X <sup>1516</sup>   |                   |                   |                                                                   |
| FKBP4   | 0.93    | 0.65  | 0.18   |          |      |                                              |      |                |                  |      |      | X <sup>7</sup>  |                 | X <sup>1416</sup>   |                   |                   | Virus entry                                                       |
| FMR1    | 0.94    | 0.67  | 0.18   |          |      |                                              |      |                | X <sup>4</sup>   |      | X    |                 | X <sup>10</sup> |                     |                   |                   |                                                                   |
| FTO     | 0.92    | 0.63  | 0.27   |          |      |                                              |      |                |                  |      |      |                 |                 |                     |                   |                   |                                                                   |
| FUBP3   | 0.95    | 0.8   | 0.14   |          |      |                                              |      |                | X <sup>23</sup>  |      |      |                 | X <sup>8</sup>  |                     |                   |                   |                                                                   |
| FXR1    | 0.92    | 0.6   | 0.26   | 0.86     | 0.26 | X                                            |      |                |                  |      |      |                 | X <sup>8</sup>  |                     |                   |                   |                                                                   |
| FXR2    | 0.94    | 0.67  | 0.23   | 0.8      | 0.18 | X                                            |      |                |                  |      |      |                 | X <sup>10</sup> |                     |                   |                   |                                                                   |
| G3BP1   | 0.93    | 0.64  | 0.31   |          |      | X                                            | X    |                | X <sup>234</sup> |      |      |                 | X <sup>8</sup>  | X <sup>111516</sup> |                   |                   | Innate response to dsRNA, Inflammation, ER stress, Cytokine Storm |
| GPKOW   | 0.92    | 0.71  | 0.16   |          |      |                                              |      | X              |                  |      |      |                 |                 |                     |                   |                   |                                                                   |
| GRSF1   | 0.93    | 0.71  | 0.18   |          |      |                                              |      | X              | X <sup>4</sup>   |      |      |                 |                 |                     |                   |                   |                                                                   |
| GTF2F1  | 0.94    | 0.71  | 0.29   |          |      |                                              |      |                | X <sup>4</sup>   |      |      |                 |                 | X <sup>15</sup>     |                   | X <sup>17</sup>   |                                                                   |
| HNRNPA1 | 0.94    | 0.74  | 0.11   |          |      |                                              |      |                | X <sup>23</sup>  | X    |      |                 |                 | X <sup>15</sup>     |                   | X <sup>1718</sup> |                                                                   |
| HNRNPC  | 0.97    | 0.83  | 0.15   |          |      |                                              |      |                |                  | X    |      | X <sup>67</sup> |                 | X <sup>1516</sup>   |                   | X <sup>18</sup>   |                                                                   |
| HNRNPD  |         |       |        | 0.94     | 0.47 |                                              |      |                |                  |      |      | X <sup>7</sup>  | X <sup>10</sup> | X <sup>1516</sup>   |                   |                   |                                                                   |
| HNRNPK  | 0.98    | 0.87  | 0.3    |          |      |                                              |      |                |                  | X    |      | X <sup>67</sup> |                 | X <sup>1516</sup>   |                   | X <sup>17</sup>   |                                                                   |
| HNRNPL  | 0.97    | 0.86  | 0.31   |          |      |                                              |      |                | X <sup>23</sup>  | X    |      | X <sup>6</sup>  | X <sup>10</sup> |                     |                   |                   |                                                                   |
| HNRNPM  | 0.95    | 0.74  | 0.22   |          |      |                                              | X    |                |                  | X    | X    | X <sup>7</sup>  | X <sup>9</sup>  |                     |                   |                   |                                                                   |
| IGF2BP1 | 0.91    | 0.66  | 0.12   | 0.83     | 0.19 |                                              |      |                | X <sup>23</sup>  | X    | X    | X <sup>6</sup>  |                 | X <sup>1416</sup>   |                   | X <sup>17</sup>   |                                                                   |
| IGF2BP2 | 0.91    | 0.65  | 0.13   | 0.84     | 0.29 |                                              |      |                | X <sup>2</sup>   |      | X    |                 |                 | X <sup>8</sup>      |                   | X <sup>17</sup>   |                                                                   |
| IGF2BP3 | 0.88    | 0.56  | 0.08   | 0.84     | 0.42 |                                              |      |                |                  | X    | X    |                 | X <sup>8</sup>  | X <sup>14</sup>     |                   | X <sup>1718</sup> |                                                                   |
| ILF3    | 0.93    | 0.74  | 0.15   |          |      |                                              |      |                | X <sup>4</sup>   |      |      |                 | X <sup>7</sup>  | X <sup>9</sup>      | X <sup>1516</sup> |                   | X <sup>17</sup>                                                   |

COMPUTATIONAL MAPPING OF THE HUMAN-SARS-CoV-2 PROTEIN-RNA INTERACTOME

|         |      |      |      |      |      |  |   |   |                  |   |   |  |                 |                       |                   |                   |                                                                                                                                       |
|---------|------|------|------|------|------|--|---|---|------------------|---|---|--|-----------------|-----------------------|-------------------|-------------------|---------------------------------------------------------------------------------------------------------------------------------------|
| KHDRBS1 | 0.97 | 0.86 | 0.18 |      |      |  |   |   |                  | X |   |  | X <sup>9</sup>  | X <sup>1516</sup>     |                   | X <sup>1718</sup> | Innate response to dsRNA, Inflammation, MAPK activation, Stress granules, Cytokine Storm                                              |
| KHSRP   | 0.9  | 0.65 | 0.15 |      |      |  |   |   |                  | X | X |  |                 | X <sup>1516</sup>     |                   | X <sup>1718</sup> | Apoptosis, Fibrosis, Innate response to dsRNA, Virus entry, Inflammation, ER stress, MAPK activation, Stress granules, Cytokine Storm |
| LIRE1   |      |      |      | 0.96 | 0.59 |  | X |   |                  | X |   |  |                 |                       |                   |                   |                                                                                                                                       |
| MATR3   | 0.94 | 0.7  | 0.23 |      |      |  |   | X | X <sup>4</sup>   | X |   |  | X <sup>8</sup>  | X <sup>1516</sup>     |                   |                   |                                                                                                                                       |
| MBNL1   |      |      |      | 0.98 | 0.94 |  |   |   |                  |   |   |  |                 | X <sup>16</sup>       |                   |                   |                                                                                                                                       |
| NCBP2   | 0.93 | 0.71 | 0.24 |      |      |  |   |   |                  |   |   |  |                 |                       |                   |                   |                                                                                                                                       |
| NIP7    | 0.92 | 0.69 | 0.15 |      |      |  |   |   |                  |   |   |  | X <sup>7</sup>  |                       |                   |                   |                                                                                                                                       |
| NONO    | 0.92 | 0.6  | 0.15 | 0.93 | 0.38 |  | X |   |                  |   |   |  | X <sup>7</sup>  | X <sup>89</sup>       | X <sup>1516</sup> | X <sup>17</sup>   |                                                                                                                                       |
| NOP56   |      |      |      | 0.92 | 0.69 |  |   |   |                  |   |   |  |                 | X <sup>1516</sup>     |                   | X <sup>1718</sup> |                                                                                                                                       |
| NOP58   |      |      |      | 0.93 | 0.68 |  |   |   | X <sup>4</sup>   |   |   |  |                 |                       |                   |                   |                                                                                                                                       |
| ORF1p   |      |      |      | 0.97 | 0.67 |  |   |   |                  |   |   |  |                 |                       |                   |                   |                                                                                                                                       |
| PCBP1   | 0.93 | 0.67 | 0.16 |      |      |  |   |   |                  |   |   |  | X <sup>10</sup> | X <sup>1516</sup>     |                   |                   |                                                                                                                                       |
| PCBP2   | 0.96 | 0.79 | 0.3  |      |      |  |   | X | X <sup>23</sup>  |   |   |  |                 | X <sup>15</sup>       |                   |                   | Fibrosis, Innate response to dsRNA, Virus entry, Inflammation, ER stress, MAPK activation, Stress granules, Cytokine Storm            |
| PRPF8   | 0.95 | 0.74 | 0.33 |      |      |  |   |   |                  |   |   |  |                 | X <sup>14</sup>       |                   |                   |                                                                                                                                       |
| PTBP1   | 0.94 | 0.8  | 0.37 |      |      |  |   |   |                  | X |   |  | X <sup>67</sup> | X <sup>8</sup>        | X <sup>1516</sup> | X <sup>1718</sup> |                                                                                                                                       |
| PUM2    | 0.95 | 0.8  | 0.16 | 0.95 | 0.72 |  |   |   |                  |   |   |  | X <sup>10</sup> | X <sup>1516</sup>     |                   |                   |                                                                                                                                       |
| QKI     | 0.97 | 0.87 | 0.31 | 0.97 | 0.64 |  |   |   |                  |   |   |  |                 |                       |                   | X <sup>1718</sup> |                                                                                                                                       |
| RBFOX2  | 0.96 | 0.8  | 0.24 |      |      |  |   |   |                  |   |   |  |                 | X <sup>1516</sup>     |                   |                   |                                                                                                                                       |
| RBM20   |      |      |      | 0.91 | 0.59 |  |   |   |                  |   |   |  |                 |                       |                   |                   |                                                                                                                                       |
| RBM22   | 0.91 | 0.72 | 0.2  |      |      |  |   |   |                  |   |   |  |                 |                       |                   | X <sup>1718</sup> |                                                                                                                                       |
| RBPMS   |      |      |      | 0.97 | 0.78 |  |   |   |                  |   |   |  |                 |                       | X <sup>13</sup>   |                   |                                                                                                                                       |
| RPS3    | 0.94 | 0.63 | 0.28 |      |      |  |   |   | X <sup>234</sup> |   |   |  | X <sup>10</sup> | X <sup>12141516</sup> |                   |                   |                                                                                                                                       |
| SAFB2   | 0.93 | 0.7  | 0.11 |      |      |  |   |   |                  |   |   |  | X <sup>9</sup>  | X <sup>15</sup>       |                   | X <sup>18</sup>   |                                                                                                                                       |
| SF3A3   | 0.96 | 0.84 | 0.23 |      |      |  |   |   |                  |   |   |  |                 |                       |                   |                   |                                                                                                                                       |
| SF3B4   | 0.98 | 0.88 | 0.26 |      |      |  | X | X |                  |   |   |  |                 |                       |                   |                   |                                                                                                                                       |
| SND1    | 0.95 | 0.75 | 0.21 |      |      |  |   |   | X <sup>234</sup> |   |   |  | X <sup>5</sup>  | X <sup>8</sup>        | X <sup>15</sup>   | X <sup>1718</sup> |                                                                                                                                       |
| SRRM4   |      |      |      | 0.8  | 0.31 |  |   |   |                  |   |   |  |                 |                       |                   |                   |                                                                                                                                       |
| SRSF1   | 0.94 | 0.7  | 0.28 |      |      |  |   |   |                  | X |   |  | X <sup>67</sup> | X <sup>1516</sup>     |                   |                   |                                                                                                                                       |
| SRSF7   | 0.92 | 0.69 | 0.17 |      |      |  | X |   | X <sup>4</sup>   | X |   |  |                 | X <sup>16</sup>       |                   |                   |                                                                                                                                       |
| SRSF9   | 0.92 | 0.65 | 0.18 |      |      |  |   |   |                  |   |   |  |                 | X <sup>141516</sup>   |                   |                   |                                                                                                                                       |
| SUGP2   | 0.9  | 0.63 | 0.15 |      |      |  |   |   | X <sup>4</sup>   |   |   |  |                 |                       |                   |                   |                                                                                                                                       |
| TAF15   | 0.93 | 0.7  | 0.17 | 0.88 | 0.28 |  |   |   |                  |   |   |  |                 | X <sup>15</sup>       |                   |                   |                                                                                                                                       |
| TARDBP  | 0.98 | 0.92 | 0.28 | 0.95 | 0.73 |  | X |   |                  | X |   |  |                 |                       |                   | X <sup>18</sup>   | Apoptosis, Fibrosis, Innate response to dsRNA, Virus entry, Inflammation, ER stress, MAPK activation, Stress granules, Cytokine Storm |
| TIAL1   | 0.95 | 0.8  | 0.13 |      |      |  |   |   | X <sup>4</sup>   |   |   |  | X <sup>10</sup> |                       |                   | X <sup>1718</sup> |                                                                                                                                       |
| TRA2A   | 0.96 | 0.8  | 0.29 |      |      |  |   |   |                  |   |   |  |                 | X <sup>141516</sup>   |                   |                   |                                                                                                                                       |
| U2AF2   | 0.95 | 0.77 | 0.15 |      |      |  |   |   |                  |   |   |  | X <sup>67</sup> |                       |                   | X <sup>1718</sup> |                                                                                                                                       |
| XRN2    | 0.93 | 0.64 | 0.18 |      |      |  |   |   |                  |   |   |  |                 | X <sup>15</sup>       |                   |                   |                                                                                                                                       |
| YBX3    | 0.92 | 0.71 | 0.1  |      |      |  |   |   | X <sup>2</sup>   |   |   |  | X <sup>8</sup>  |                       |                   |                   |                                                                                                                                       |
| ZC3H7B  |      |      |      | 0.87 | 0.37 |  |   |   |                  |   |   |  |                 |                       |                   |                   |                                                                                                                                       |
| ZFP36   |      |      |      | 0.93 | 0.46 |  |   |   | X <sup>4</sup>   |   |   |  |                 | X <sup>1516</sup>     |                   |                   |                                                                                                                                       |
| ZNF800  | 0.93 | 0.62 | 0.25 |      |      |  |   |   | X <sup>4</sup>   |   | X |  |                 | X <sup>15</sup>       |                   |                   |                                                                                                                                       |
| ZRANB2  | 0.9  | 0.64 | 0.1  |      |      |  |   |   | X <sup>4</sup>   |   |   |  |                 |                       |                   |                   |                                                                                                                                       |

<sup>1</sup> also included in the PPI network

<sup>2</sup> SARS-CoV-2 RNA interacting proteins

<sup>3</sup> proteins included in the PPI network (network based on STRING v.11 interactions between human proteins in the expanded SARS-CoV-2 RNA interactome)

<sup>4</sup> differentially expressed proteins (SARS-CoV-2 infected and uninfected Huh7 cells)

<sup>5</sup> proteins that were reduced during SARS-CoV-2 infection

<sup>6</sup> proteins that increased during SARS-CoV-2 infection

<sup>7</sup> additional potential inhibitors of SARS-CoV-2 replication

<sup>8</sup> statistically significant interactors enriched in both probe I and probe II experiment

## COMPUTATIONAL MAPPING OF THE HUMAN-SARS-CoV-2 PROTEIN-RNA INTERACTOME

- <sup>9</sup> statistically significant interactors enriched in only probe I experiment
- <sup>10</sup> statistically significant interactors enriched in only probe II experiment
- <sup>11</sup> proteins included in virus-host PPI network of SARS-CoV-2 in A549 cells
- <sup>12</sup> transcripts that significantly change upon SARS-CoV-2 infection
- <sup>13</sup> proteins that significantly change upon SARS-CoV-2 infection
- <sup>14</sup> ubiquitination site significantly changes upon SARS-CoV-2 infection
- <sup>15</sup> phosphorylation site significantly changes upon SARS-CoV-2 infection
- <sup>16</sup> included in results of enrichment analysis
- <sup>17</sup> RBPs predicted to bind the 5'UTR of SARS-CoV-2
- <sup>18</sup> RBPs predicted to bind the 3'UTR of SARS-CoV-2
- \* empirical p-value < 0.05

## COMPUTATIONAL MAPPING OF THE HUMAN-SARS-CoV-2 PROTEIN-RNA INTERACTOME

### 1095 9 Supplementary Figures

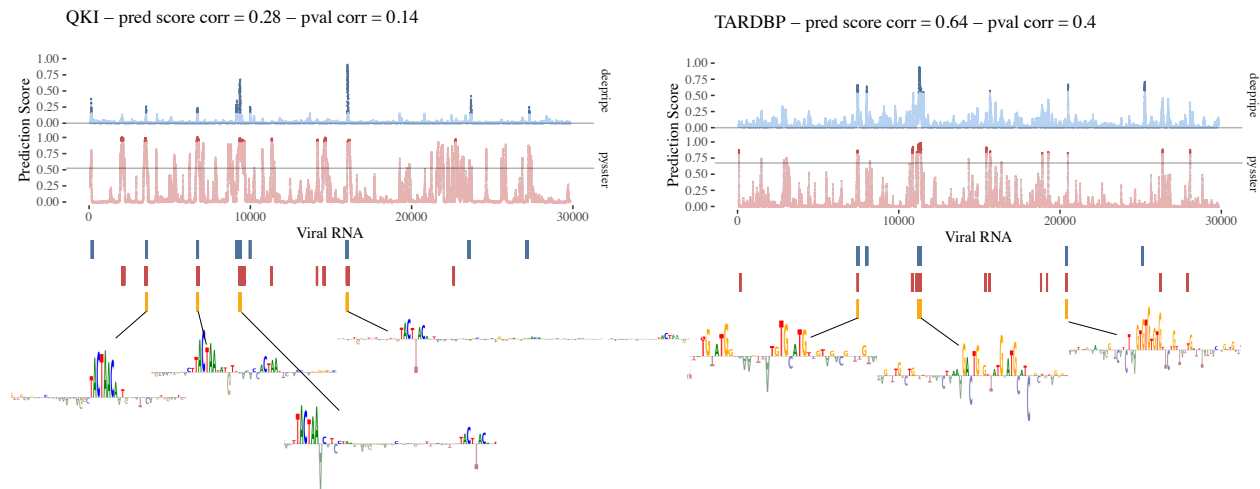

Supplementary Figure 1: RBP binding pattern on the SARS-CoV-2 genome between the two methods, pysster and DeepRiPe. Comparison of single-nucleotide probability scores of binding for two RBPs, QKI (left panel) and TARDBP (right panel). Significant binding sites, commonly predicted by both methods are shown underneath the probability plots together with their corresponding learnt motifs from the attribution maps. Prediction score correlation and p-value correlation given in the header.
